# Supplementary material for: Gas exchange velocities (k 600 ), gas exchange rates (K 600 ), and hydraulic geometries for streams and rivers derived from the NEON Reaeration field and lab collection data product (DP1.20190.001)
Source: Copernicus journal article supplement (doi:10.5194/essd-2024-330), 2024-08-13
Supplement: Supplementary file 1 [file essd-2024-330-supplement.pdf]

Supplemental information for **Gas exchange velocities ( $k_{600}$ ), gas exchange rates ( $K_{600}$ ), and hydraulic geometries for streams and rivers derived from the *NEON Reaeration field and lab collection data product (DP1.20190.001)***

Kelly S. Aho<sup>1</sup>, Kaelin Cawley<sup>2</sup>, Robert Hensley<sup>2</sup>, Robert O. Hall, Jr.<sup>3</sup>, Walter Dodds<sup>4</sup>, Keli Goodman<sup>2</sup>

<sup>1</sup>Department of Earth and Environmental Science, Department of Integrative Biology, Michigan State University, East Lansing, MI 48824, USA

<sup>2</sup>National Ecological Observatory Network, Battelle, 1685 38th St. #100, Boulder, CO 80301, USA

<sup>3</sup>Flathead Lake Biological Station, University of Montana, Polson, MT 599111, USA

<sup>4</sup>Division of Biology, Kansas State University, Manhattan, KS, 66506, USA

Contents:

Table S1 – S3

Figures S1 – S3

Table S1. Priors used in Bayesian multilevel models. Priors are given as a distribution ( $\mu$ ,  $\sigma$ ).

| Site | $K_{600}$ |          |           |           |            |           | $K_{600}$ |           |           |            |  |  |
|------|-----------|----------|-----------|-----------|------------|-----------|-----------|-----------|-----------|------------|--|--|
|      | intercept | sigma    | a         | b         | sigma_expt | intercept | sigma     | a         | b         | sigma_expt |  |  |
| BIGC | (0,0.2)   | (0, 0.1) | (-3.4,10) | (0.5,1)   | (0.2)      | (0,0.2)   | (0, 0.1)  | (0.6,10)  | (0.3,1)   | (0.2)      |  |  |
| BLDE | (0,0.2)   | (0, 0.1) | (-0.9,10) | (0.4,1)   | (0.2)      | (0,0.2)   | (0, 0.1)  | (4.2,10)  | (0.1,1)   | (0.2)      |  |  |
| CARI | (0,0.2)   | (0, 0.1) | (-0.4,10) | (0.3,1)   | (0.2)      | (0,0.2)   | (0, 0.1)  | (5.9,10)  | (-0.2,1)  | (0.2)      |  |  |
| COMO | (0,0.2)   | (0, 0.1) | (0.7,10)  | (0.4,1)   | (0.2)      | (0,0.2)   | (0, 0.1)  | (6.1,10)  | (-0.1,1)  | (0.2)      |  |  |
| CUPE | (0,0.2)   | (0, 0.1) | (0.9,10)  | (0.2,1)   | (0.2)      | (0,0.2)   | (0, 0.1)  | (8.3,10)  | (-0.3,1)  | (0.2)      |  |  |
| GUIL | (0,0.2)   | (0, 0.1) | (-1.7,10) | (0.4,1)   | (0.2)      | (0,0.2)   | (0, 0.1)  | (3.2,10)  | (0.1)     | (0.2)      |  |  |
| HOPB | (0,0.2)   | (0, 0.1) | (-1.3,10) | (0.4,1)   | (0.2)      | (0,0.2)   | (0, 0.1)  | (3.5,10)  | (0.1,1)   | (0.2)      |  |  |
| KING | (0,0.2)   | (0, 0.1) | (-6.4,10) | (0.5,0.3) | (0.2)      | (0,0.2)   | (0, 0.1)  | (-2.9,4)  | (0.4,0.4) | (0.2)      |  |  |
| LECO | (0,0.2)   | (0, 0.1) | (-0.5,10) | (0.4,1)   | (0.2)      | (0,0.2)   | (0, 0.1)  | (5.1,10)  | (0.1)     | (0.2)      |  |  |
| LEWI | (0,0.2)   | (0, 0.1) | (-2.1,10) | (0.4,1)   | (0.2)      | (0,0.2)   | (0, 0.1)  | (2.8,10)  | (0.1,1)   | (0.2)      |  |  |
| MART | (0,0.2)   | (0, 0.1) | (-1.3,10) | (0.4,1)   | (0.2)      | (0,0.2)   | (0, 0.1)  | (3.2,10)  | (0.2,1)   | (0.2)      |  |  |
| MAYF | (0,0.2)   | (0, 0.1) | (-3.3,10) | (0.4,1)   | (0.2)      | (0,0.2)   | (0, 0.1)  | (0.7,10)  | (0.1,1)   | (0.2)      |  |  |
| MCDI | (0,0.2)   | (0, 0.1) | (-4.4,10) | (0.7,1)   | (0.2)      | (0,0.2)   | (0, 0.1)  | (-2.1,10) | (0.6,1)   | (0.2)      |  |  |
| MCRA | (0,0.2)   | (0, 0.1) | (-0.3,10) | (0.4,1)   | (0.2)      | (0,0.2)   | (0, 0.1)  | (5.2,10)  | (0.1,1)   | (0.2)      |  |  |
| OKSR | (0,0.2)   | (0, 0.1) | (-3.1,10) | (0.5,1)   | (0.2)      | (0,0.2)   | (0, 0.1)  | (0.5,10)  | (0.3,1)   | (0.2)      |  |  |
| POSE | (0,0.2)   | (0, 0.1) | (-0.6,10) | (0.4,1)   | (0.2)      | (0,0.2)   | (0, 0.1)  | (5.6,10)  | (0.1)     | (0.2)      |  |  |
| PRIN | (0,0.2)   | (0, 0.1) | (-2.8,1)  | (0.4,0.3) | (0.2)      | (0,0.2)   | (0, 0.1)  | (2.2,1)   | (0,0.5)   | (0.2)      |  |  |
| REDB | (0,0.2)   | (0, 0.1) | (-0.4,10) | (0.4,1)   | (0.2)      | (0,0.2)   | (0, 0.1)  | (4.6,10)  | (0.1,1)   | (0.2)      |  |  |
| SYCA | (0,0.2)   | (0, 0.1) | (-0.6,10) | (0.3,1)   | (0.2)      | (0,0.2)   | (0, 0.1)  | (5.0,10)  | (0.0,1)   | (0.2)      |  |  |
| TECR | (0,0.2)   | (0, 0.1) | (-0.5,10) | (0.5,1)   | (0.2)      | (0,0.2)   | (0, 0.1)  | (3.6,10)  | (0.2,1)   | (0.2)      |  |  |
| WALK | (0,0.2)   | (0, 0.1) | (-1.2,10) | (0.5,1)   | (0.2)      | (0,0.2)   | (0, 0.1)  | (3.9,10)  | (0.2,1)   | (0.2)      |  |  |
| WLOU | (0,0.2)   | (0, 0.1) | (-0.3,10) | (0.4,1)   | (0.2)      | (0,0.2)   | (0, 0.1)  | (4.4,10)  | (0.1,1)   | (0.2)      |  |  |

Table S2. Issue log summarizing issues precluding estimates of gas exchange.

| Issue                                                                                       | (n) |
|---------------------------------------------------------------------------------------------|-----|
| Travel time could not be calculated from conductivity timeseries                            | 141 |
| Outlier experiment                                                                          | 61  |
| SF <sub>6</sub> at Station 1 was lower than at any of Stations 2-4                          | 56  |
| Missing discharge measurement                                                               | 42  |
| Missing concentration data (SF <sub>6</sub> , or NaCL or NaBr, when salt-correction needed) | 25  |
| SF <sub>6</sub> was not detected at $\geq 1$ station                                        | 10  |
| Missing water temperature                                                                   | 2   |
| Other (duplicate stations, no decline in SF <sub>6</sub> )                                  | 2   |
| Missing width measurement                                                                   | 1   |

Table S3. Mean, standard deviation (s.d.), minimum, maximum, and range of stream discharges with a gas exchange by site.

| Site | Mean Q (lps) | s.d. Q (lps) | Min Q (lps) | Max Q (lps) | Range Q (lps) |
|------|--------------|--------------|-------------|-------------|---------------|
| BIGC | 70.8         | 49.9         | 16.2        | 195.7       | 179.5         |
| BLDE | 287.4        | 375.3        | 60.9        | 1247.2      | 1186.3        |
| CARI | 443.2        | 292.6        | 181.7       | 1030.0      | 848.3         |
| COMO | 49.4         | 75.1         | 1.1         | 251.9       | 250.9         |
| CUPE | 66.0         | 64.1         | 17.5        | 313.0       | 295.5         |
| GUIL | 159.5        | 102.2        | 63.1        | 371.5       | 308.4         |
| HOPB | 165.7        | 250.7        | 4.7         | 869.9       | 865.3         |
| KING | 101.5        | 60.5         | 11.2        | 140.1       | 128.9         |
| LECO | 229.2        | 109.7        | 93.1        | 426.1       | 333.0         |
| LEWI | 41.6         | 37.7         | 15.4        | 159.5       | 144.1         |
| MART | 140.2        | 201.5        | 19.5        | 503.1       | 483.6         |
| MAYF | 172.7        | 80.4         | 86.1        | 329.4       | 243.3         |
| MCDI | 79.5         | 60.5         | 24.8        | 162.3       | 137.5         |
| MCRA | 179.2        | 206.3        | 8.4         | 751.5       | 743.1         |
| OKSR | 942.5        | 822.8        | 151.7       | 2512.7      | 2361.0        |
| POSE | 16.5         | 20.7         | 1.1         | 99.3        | 98.2          |
| PRIN | 107.2        | 46.0         | 61.0        | 170.6       | 109.6         |
| REDB | 105.8        | 127.1        | 12.2        | 525.3       | 513.1         |
| SYCA | 93.6         | 110.7        | 13.0        | 357.3       | 344.3         |
| TECR | 66.8         | 90.3         | 4.8         | 269.6       | 264.8         |
| WALK | 6.4          | 4.7          | 3.6         | 18.8        | 15.2          |
| WLOU | 90.5         | 119.4        | 11.5        | 525.4       | 513.9         |

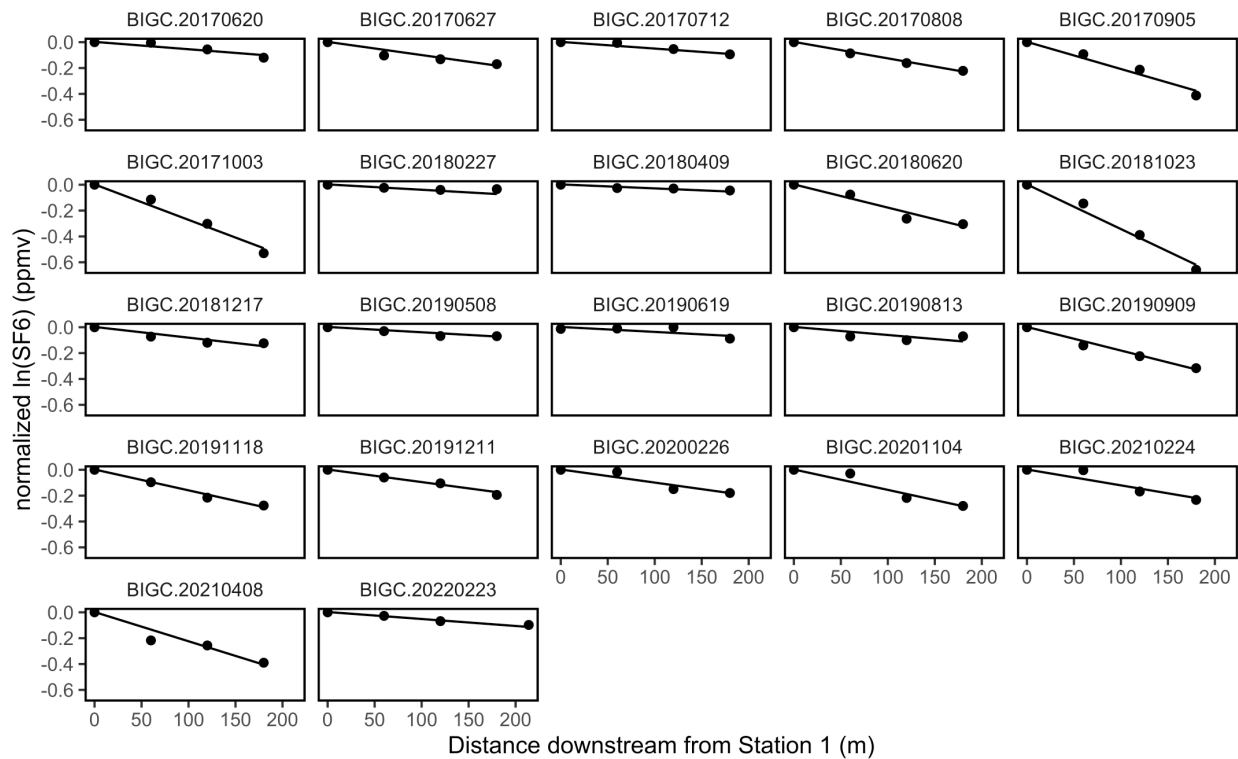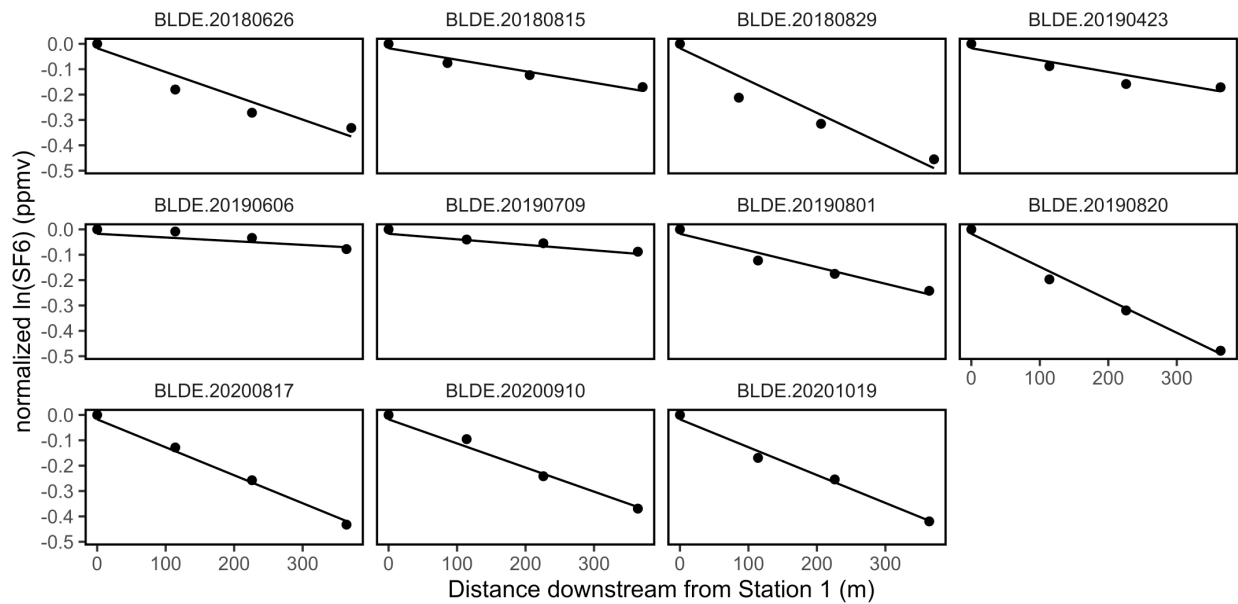

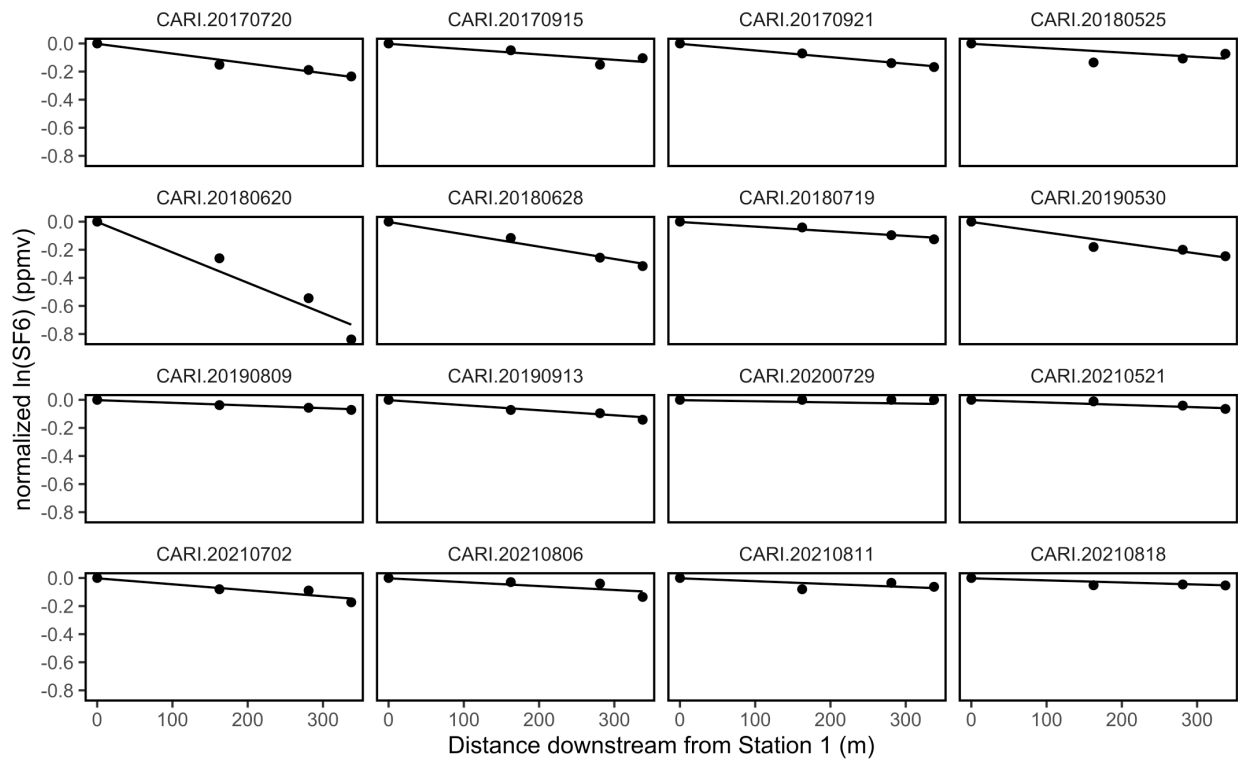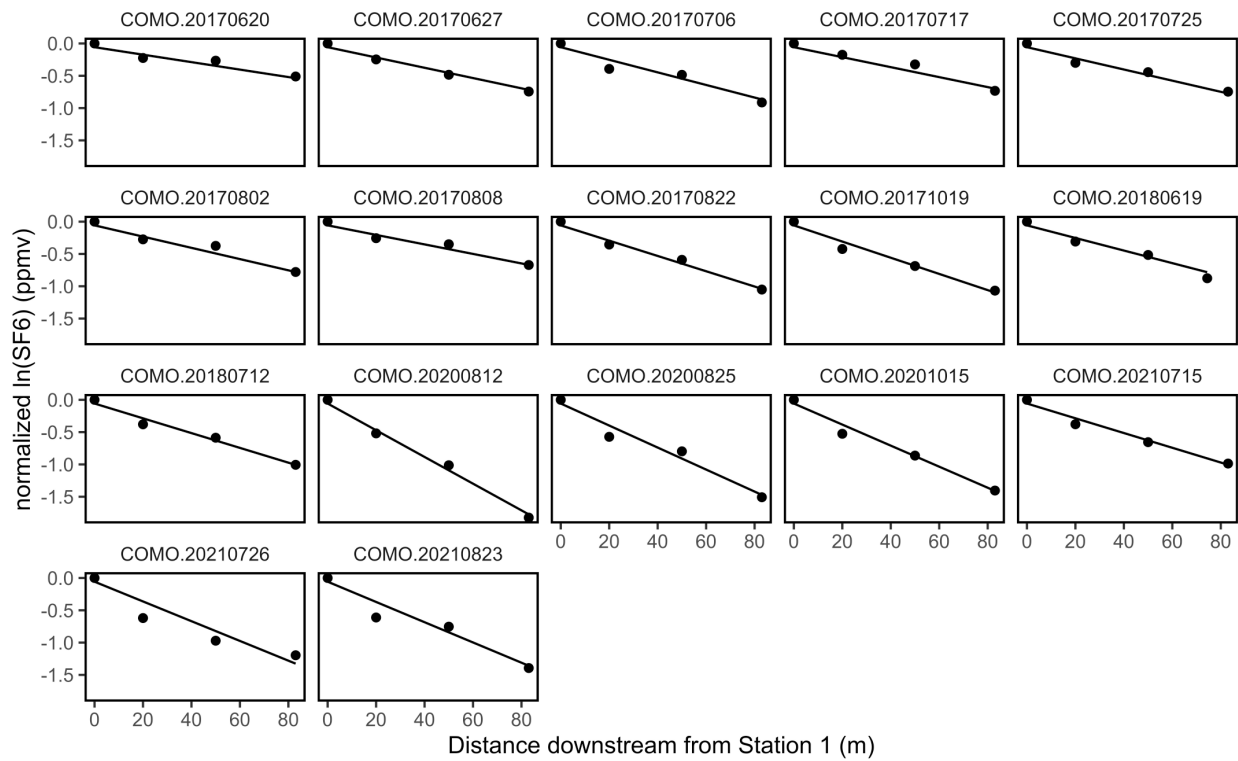

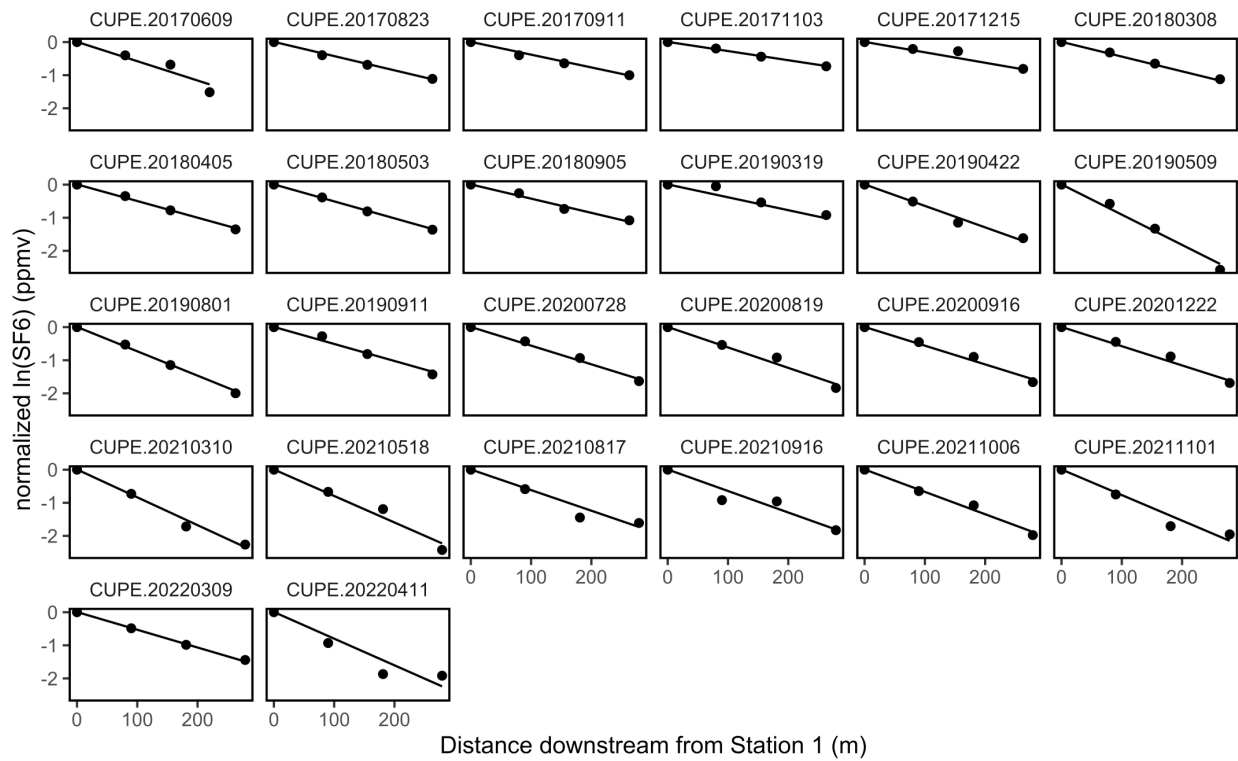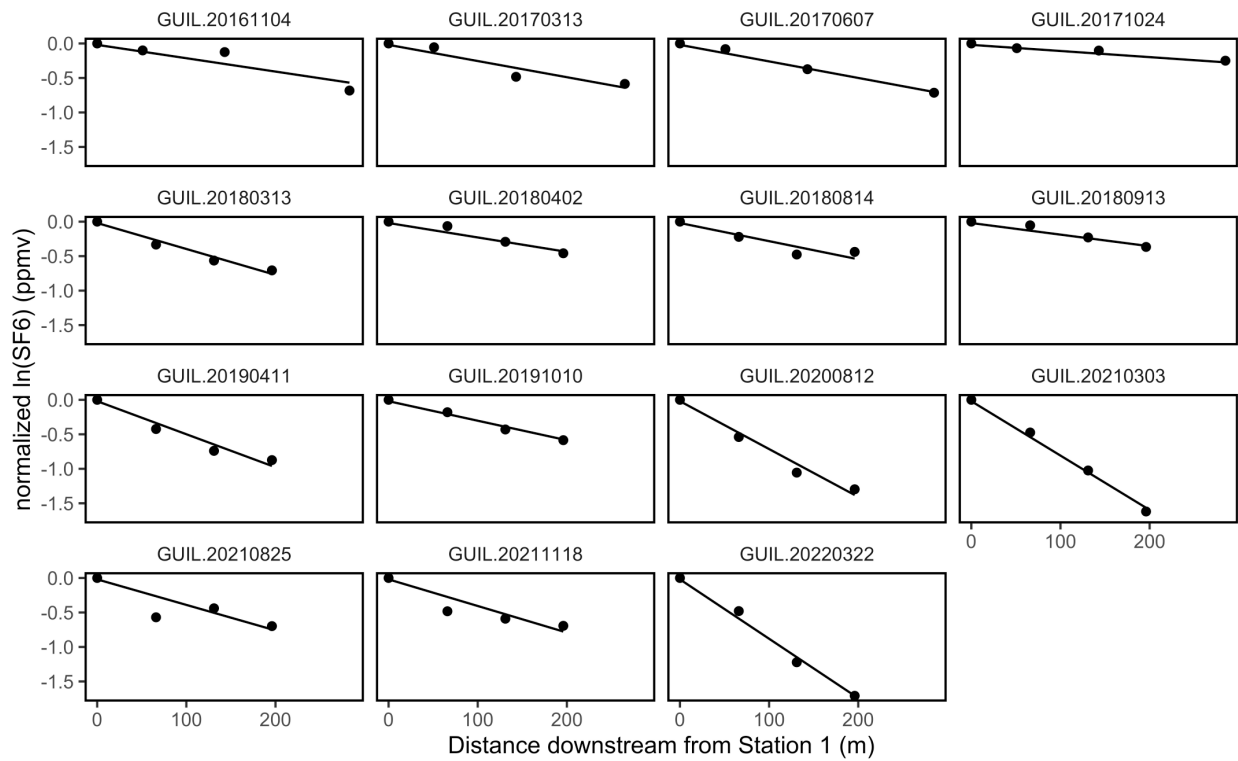

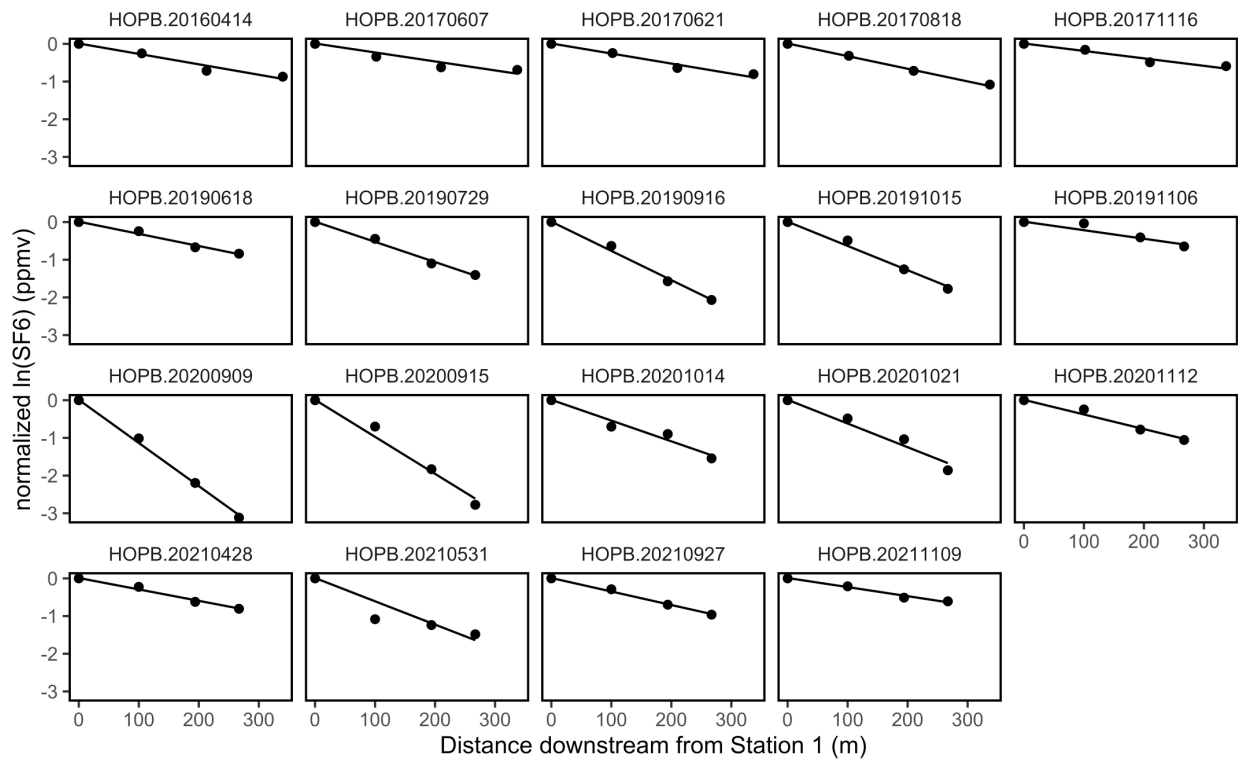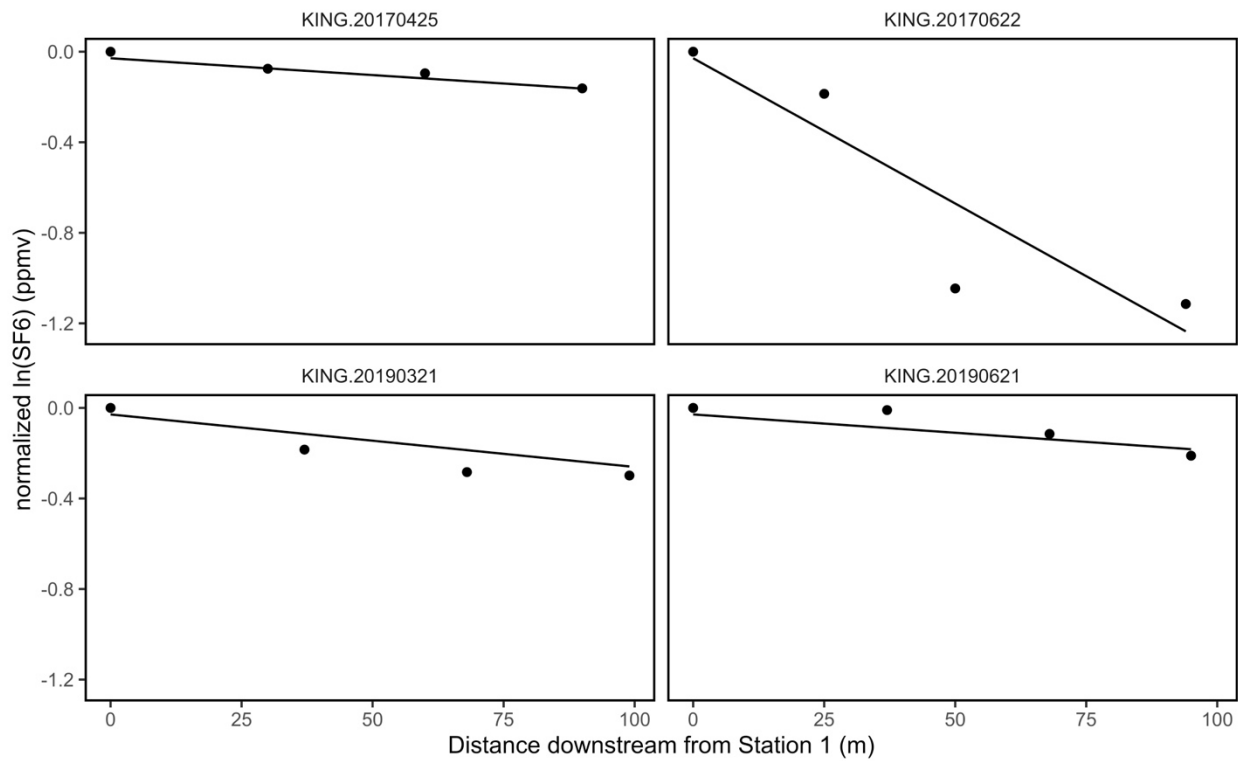

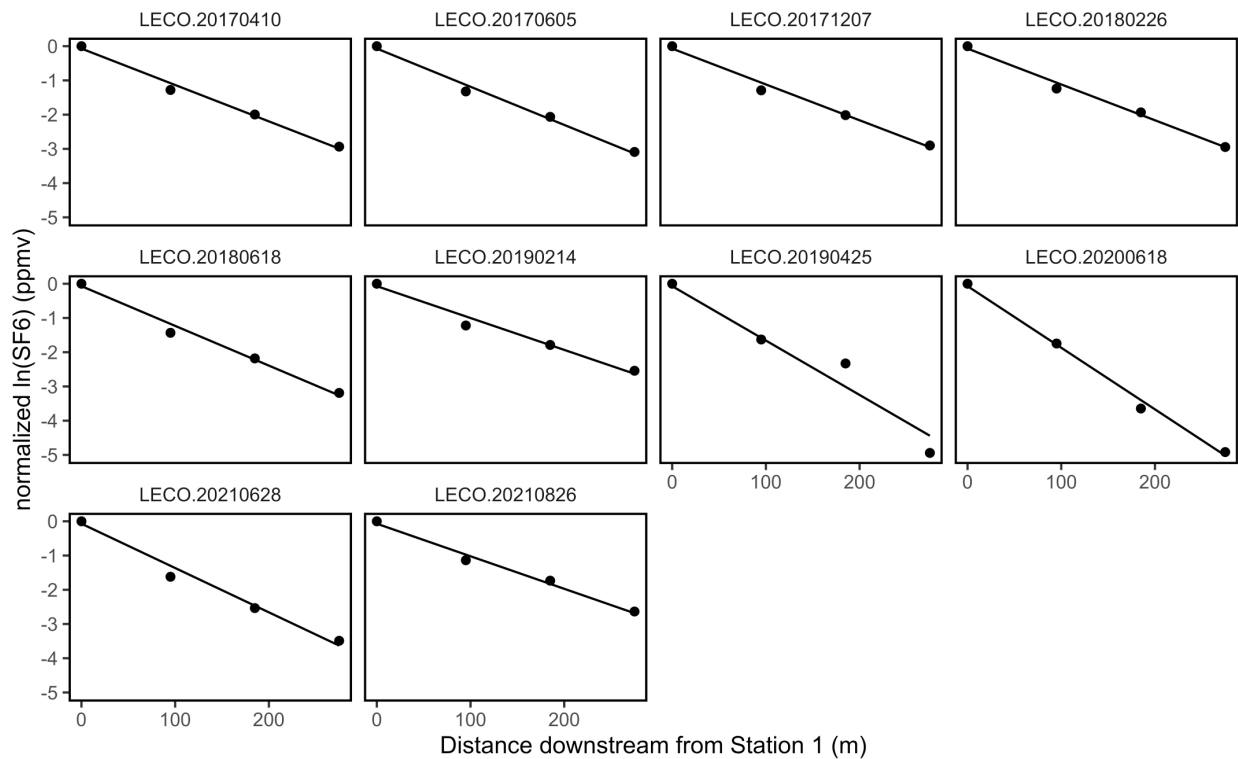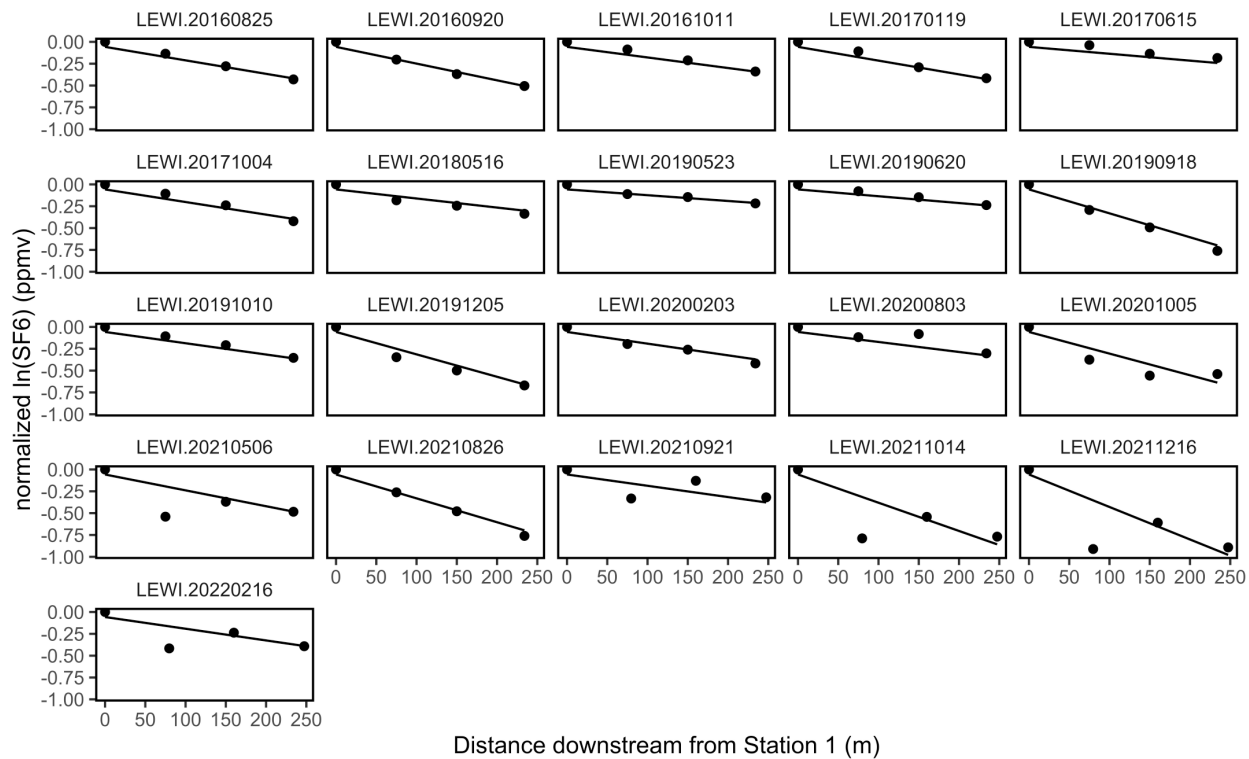



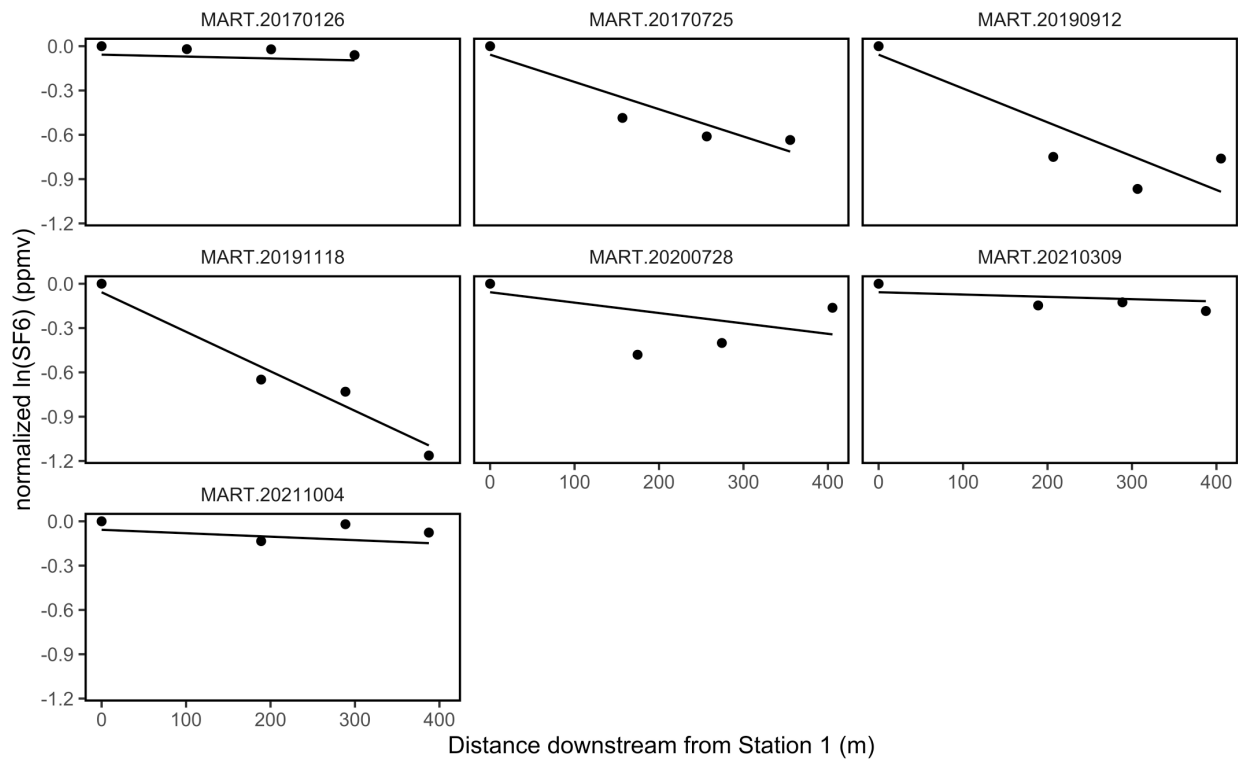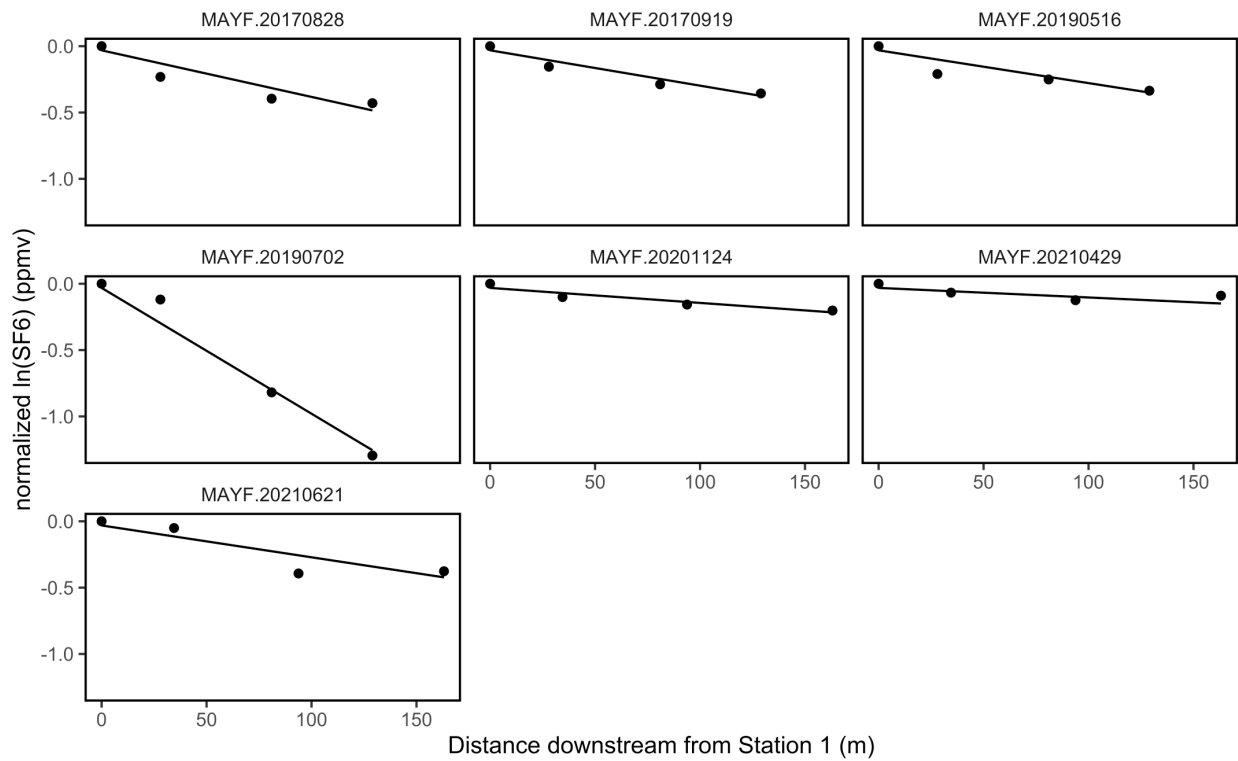

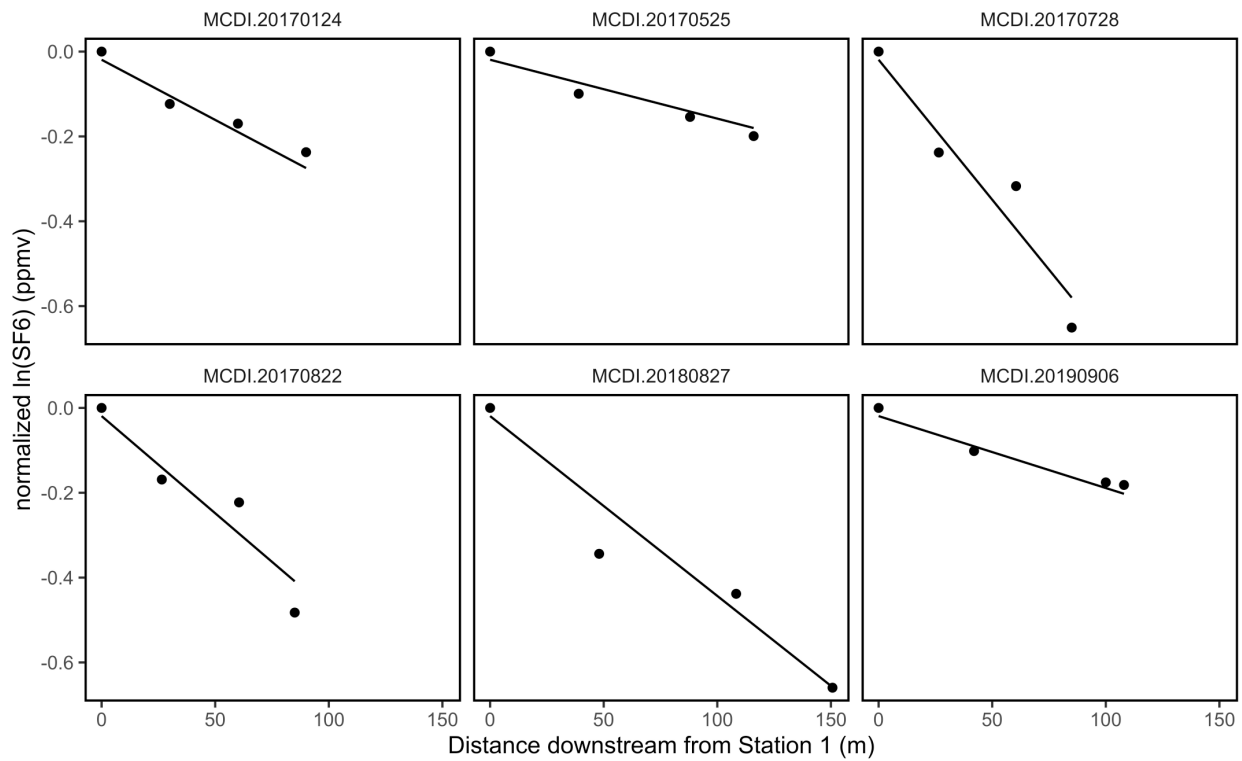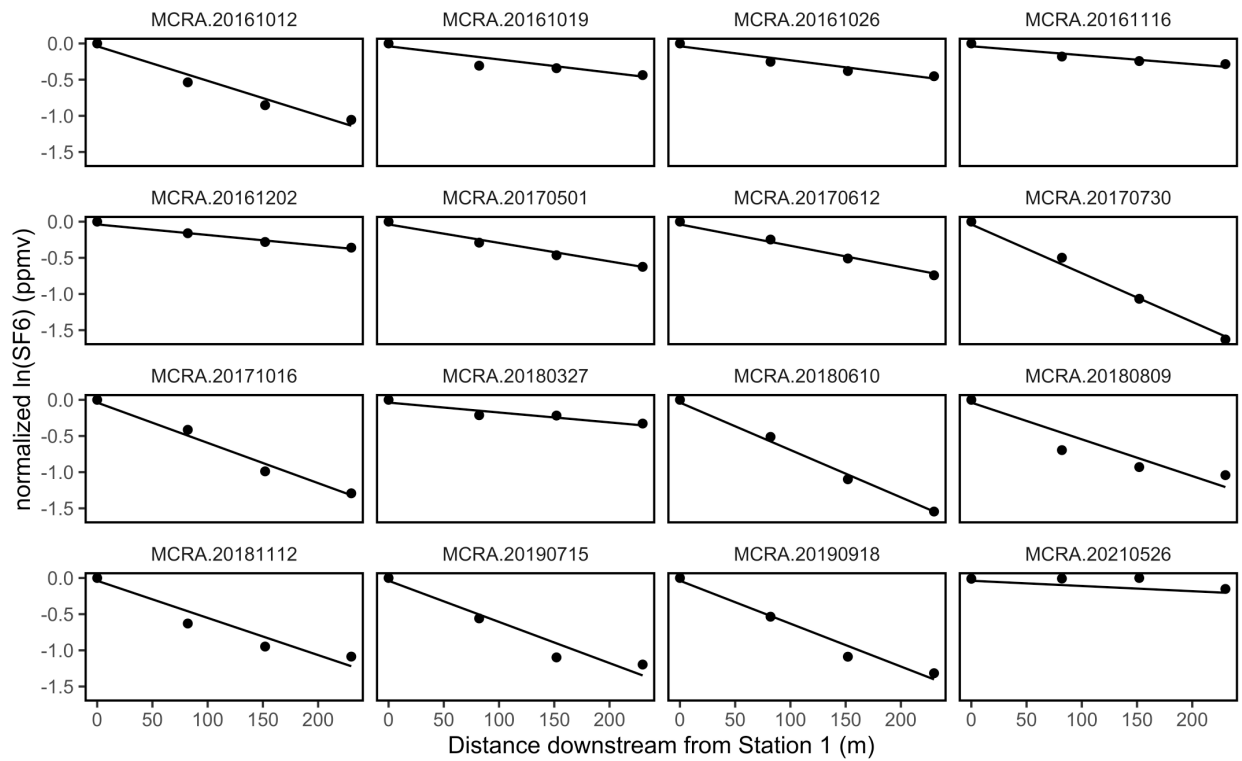

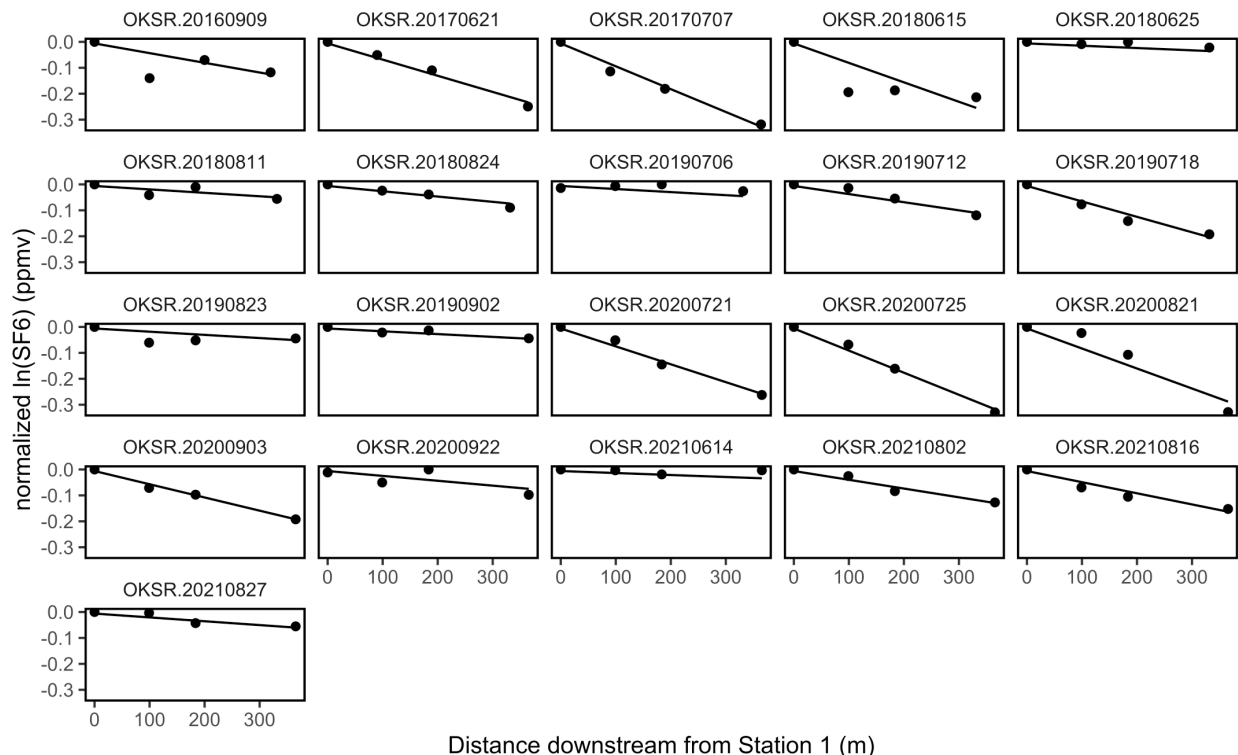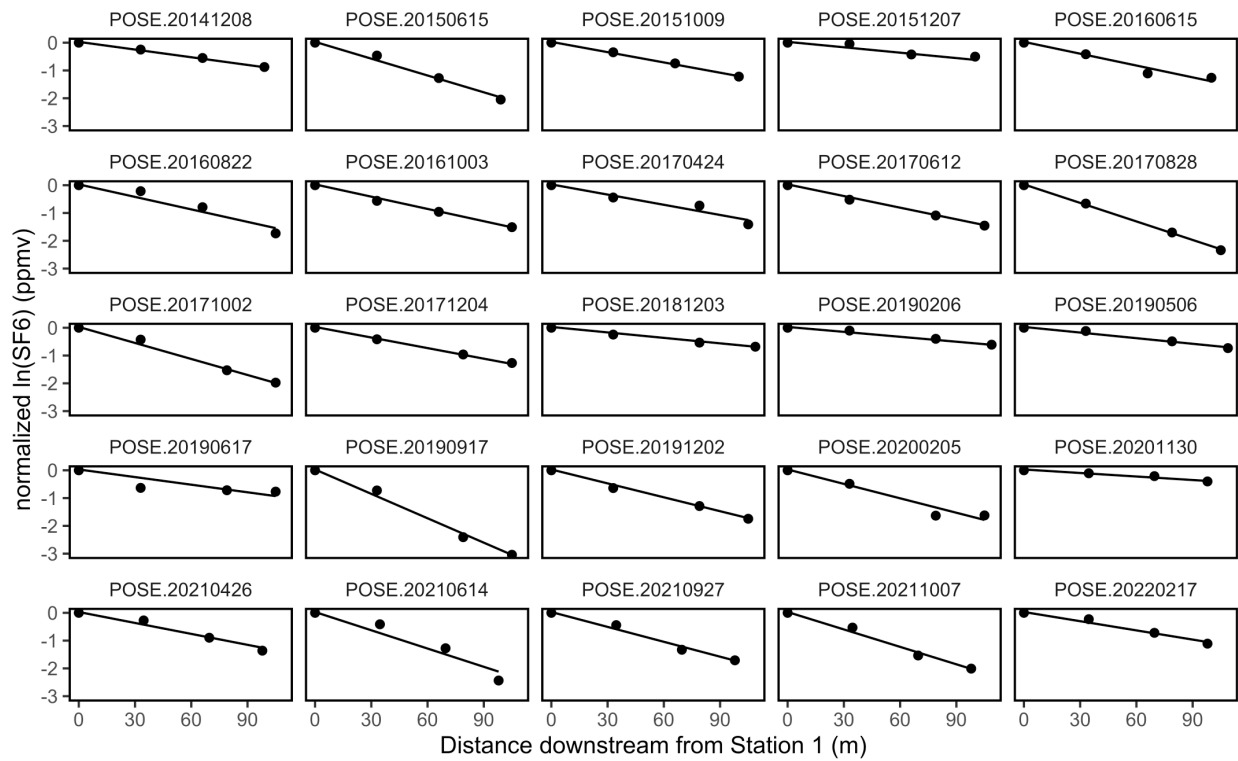

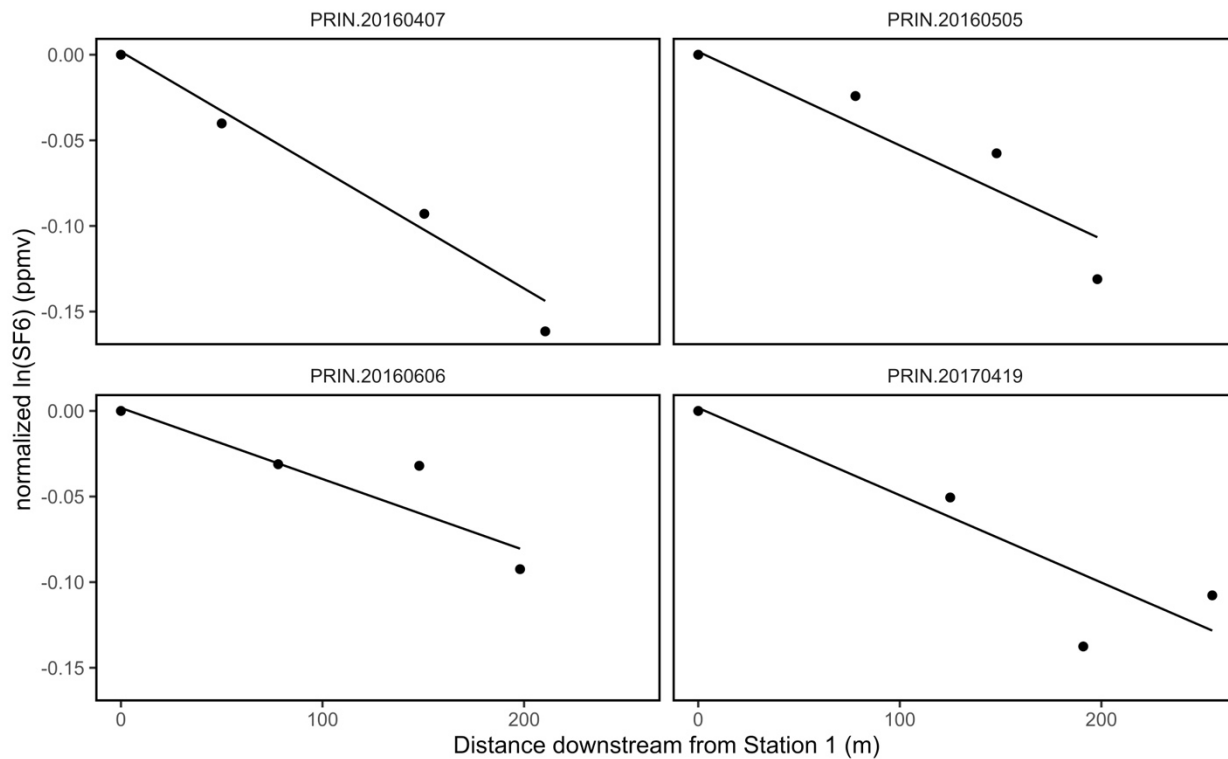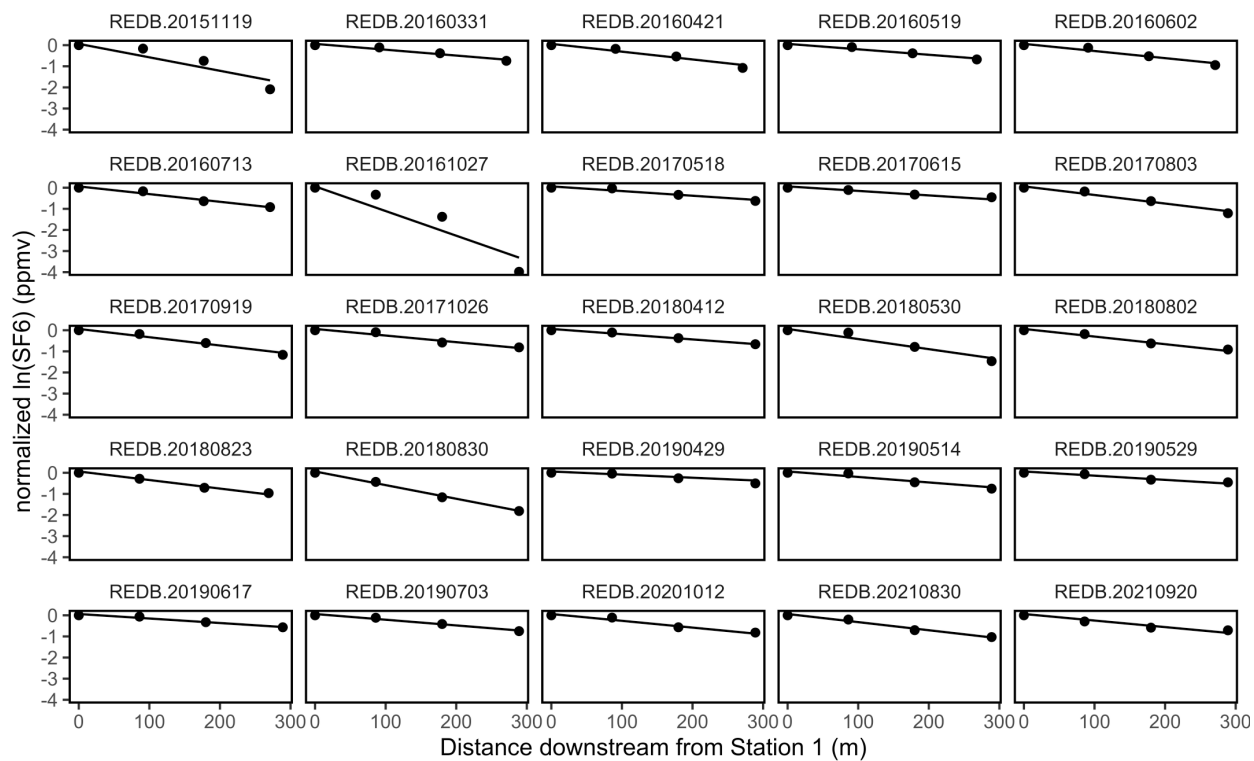

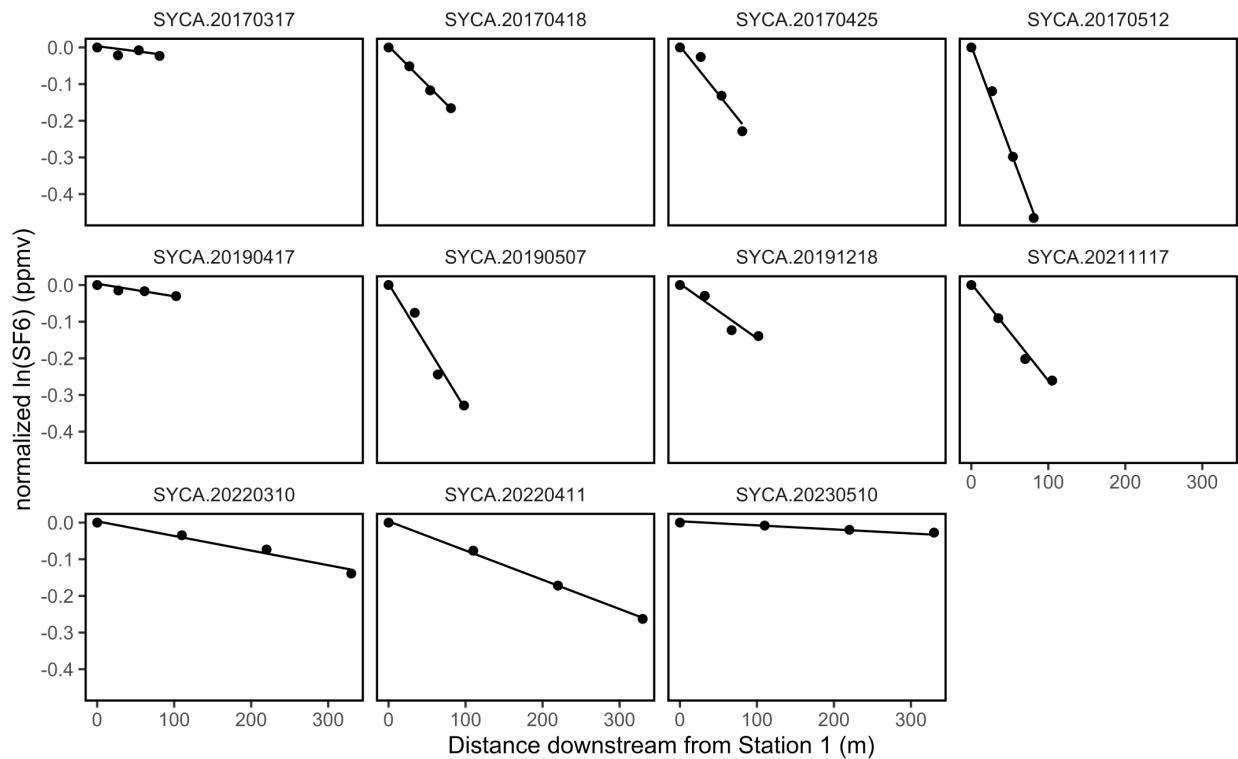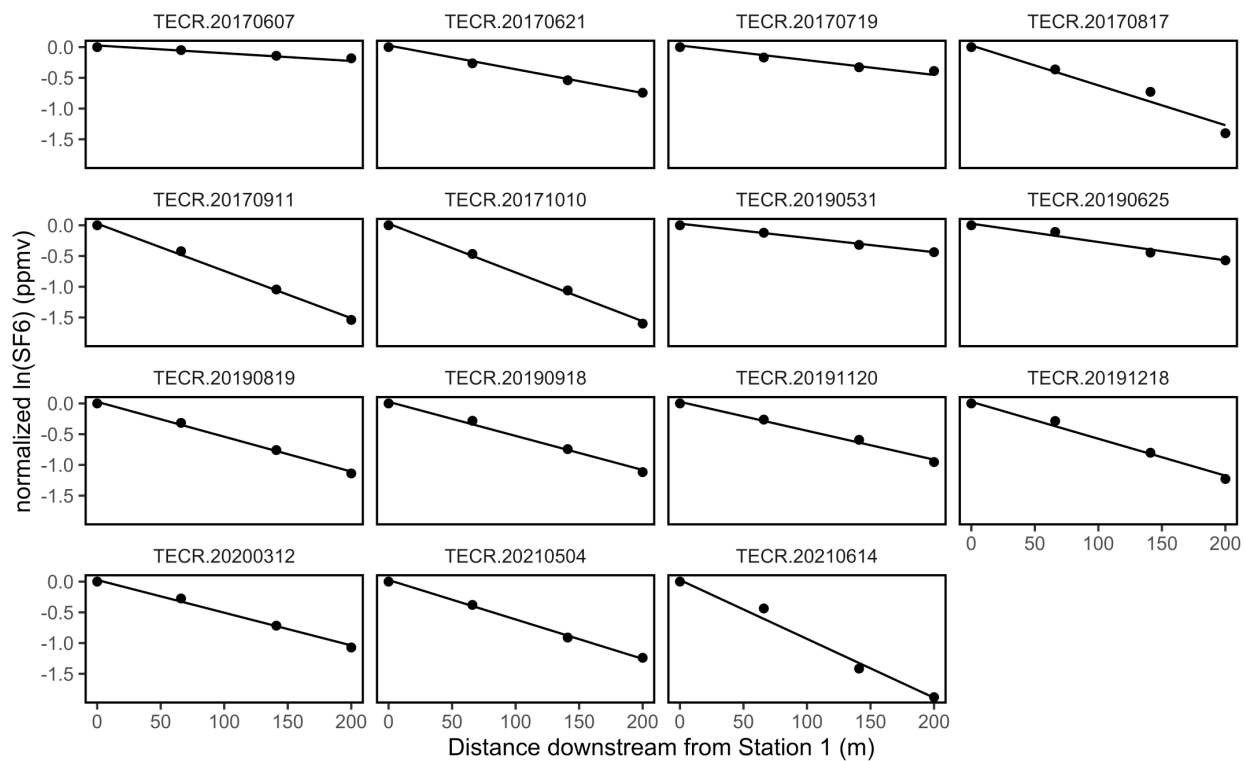

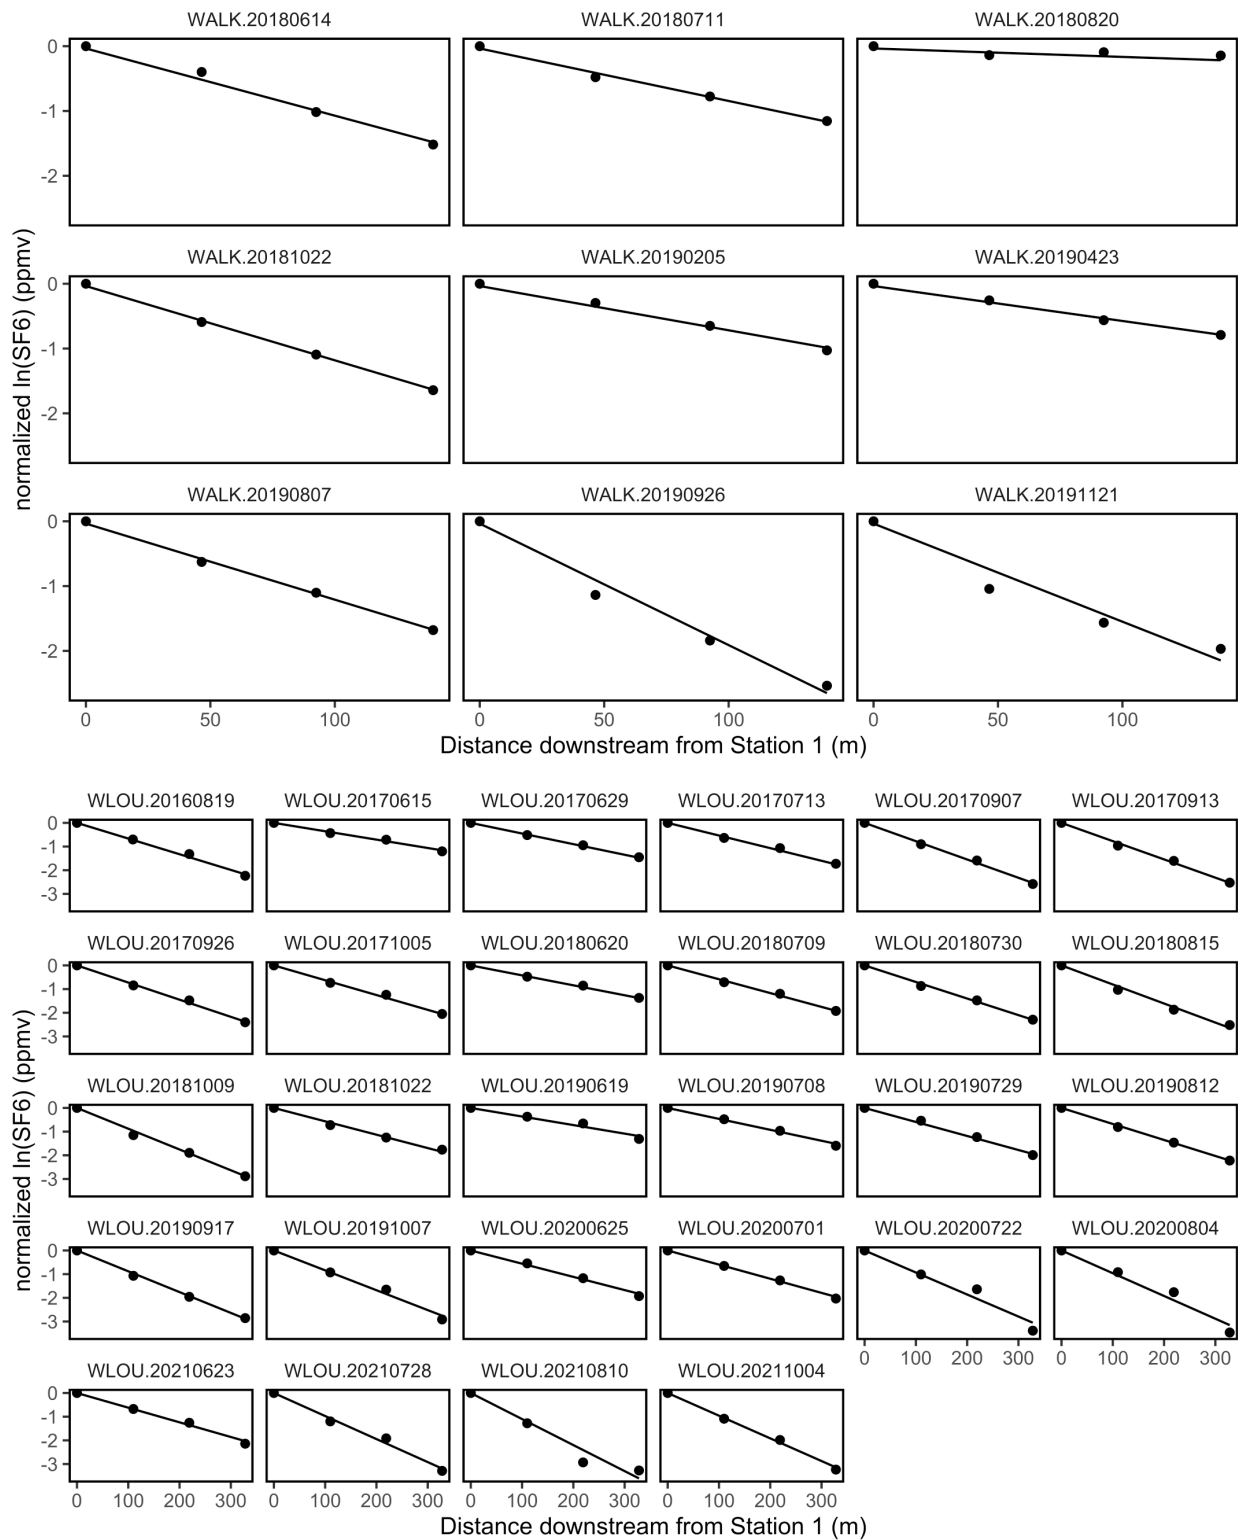

Figure S1. Model fits for Bayesian  $k_{600}$  models.

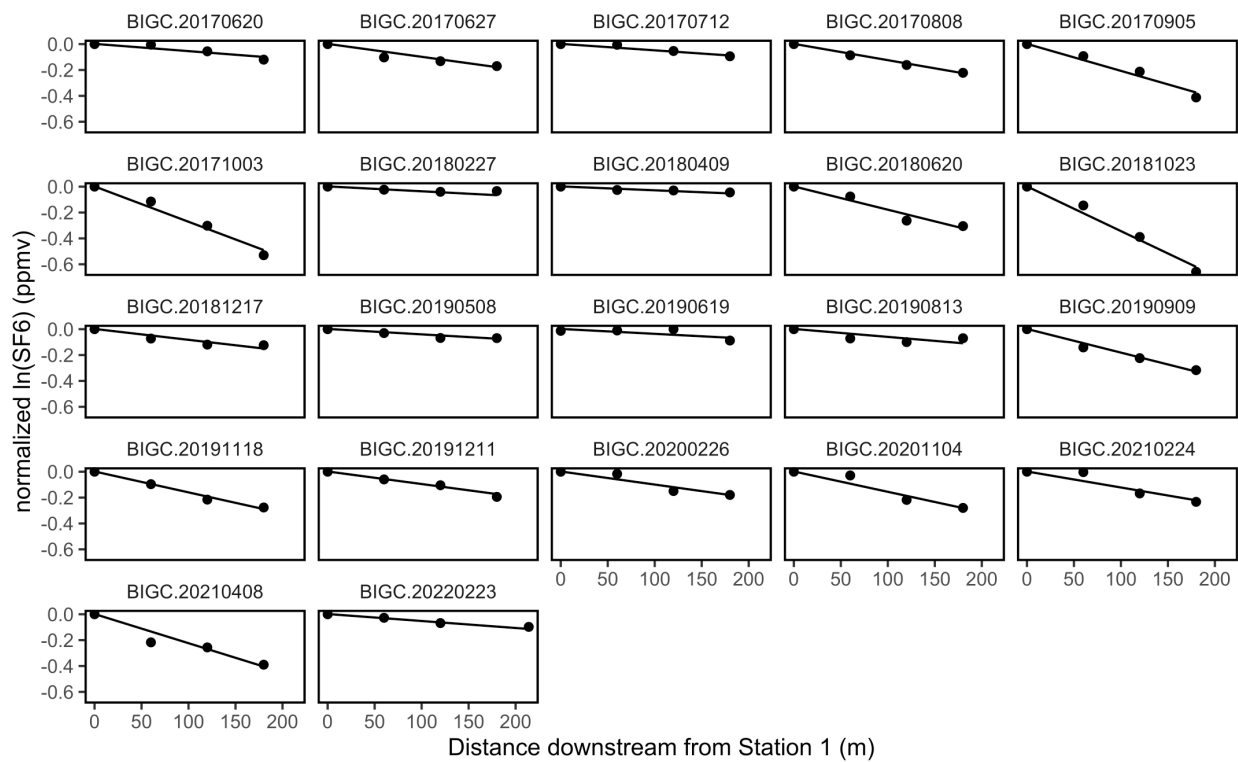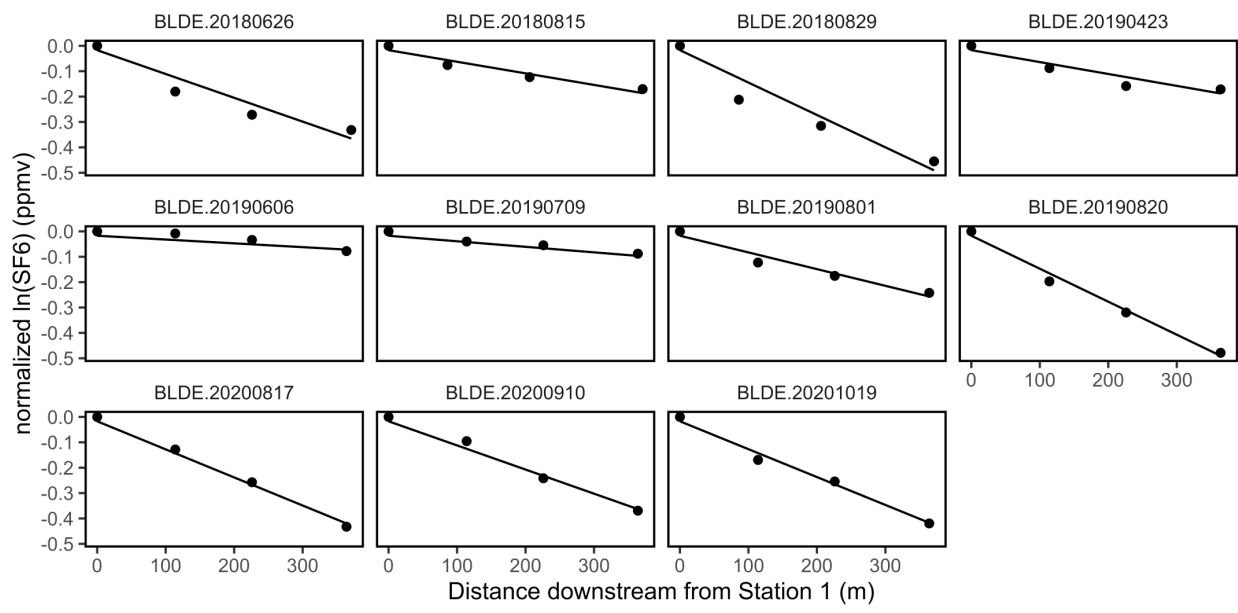

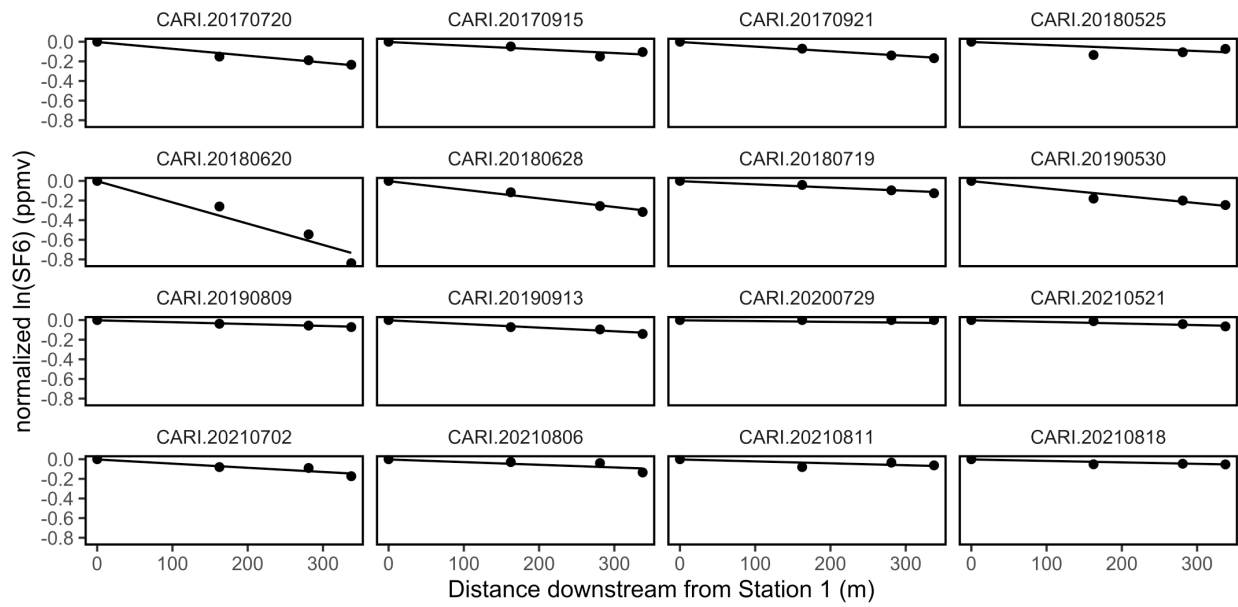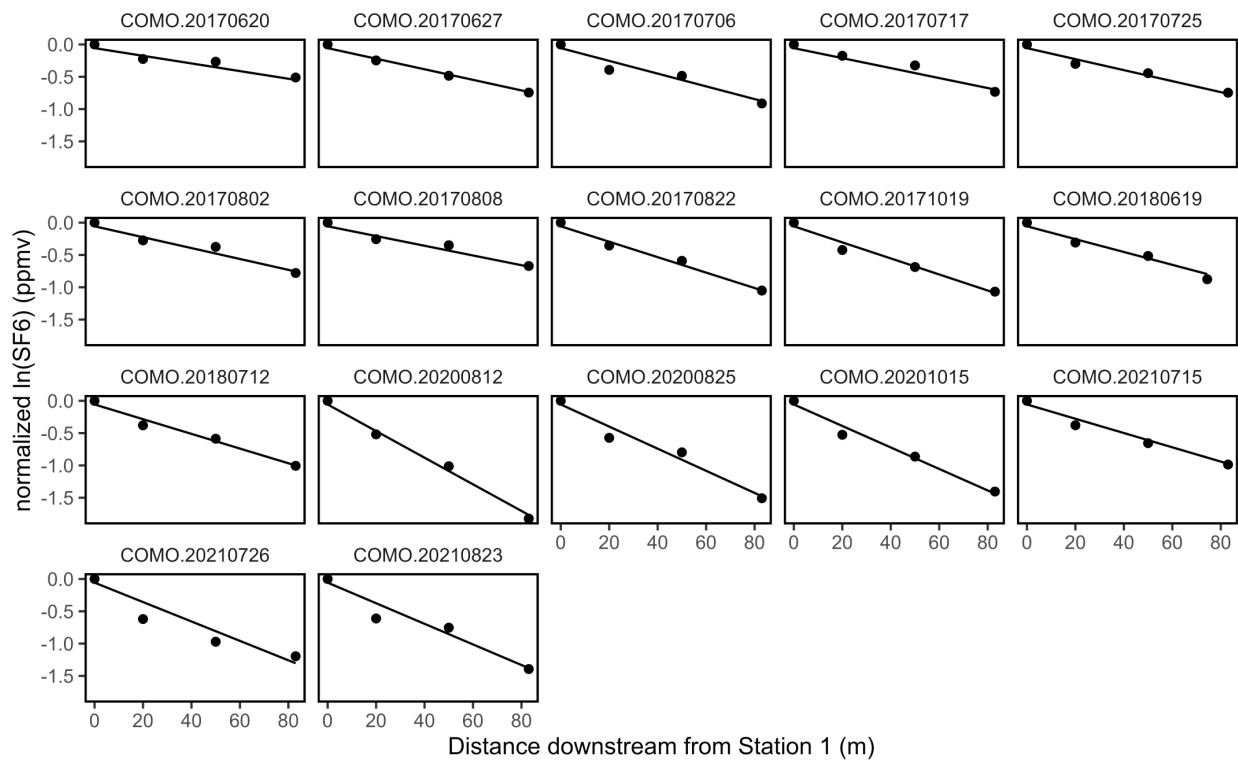



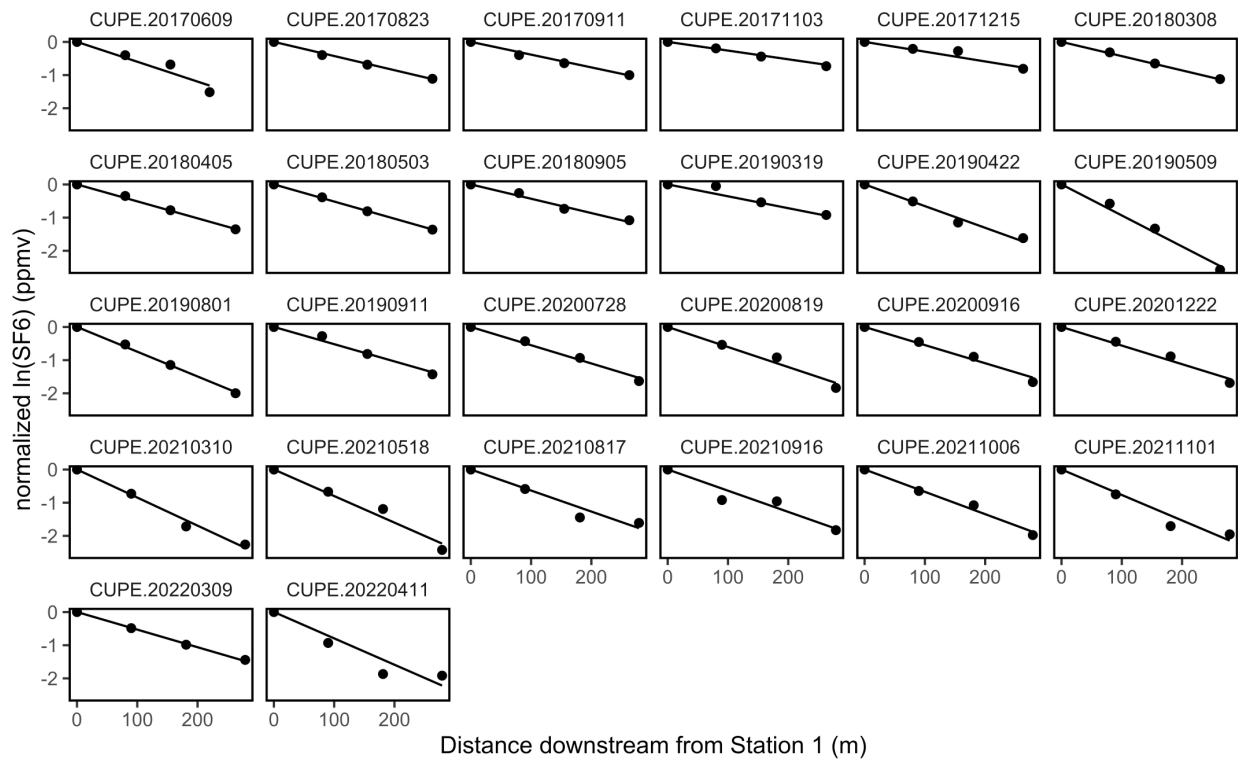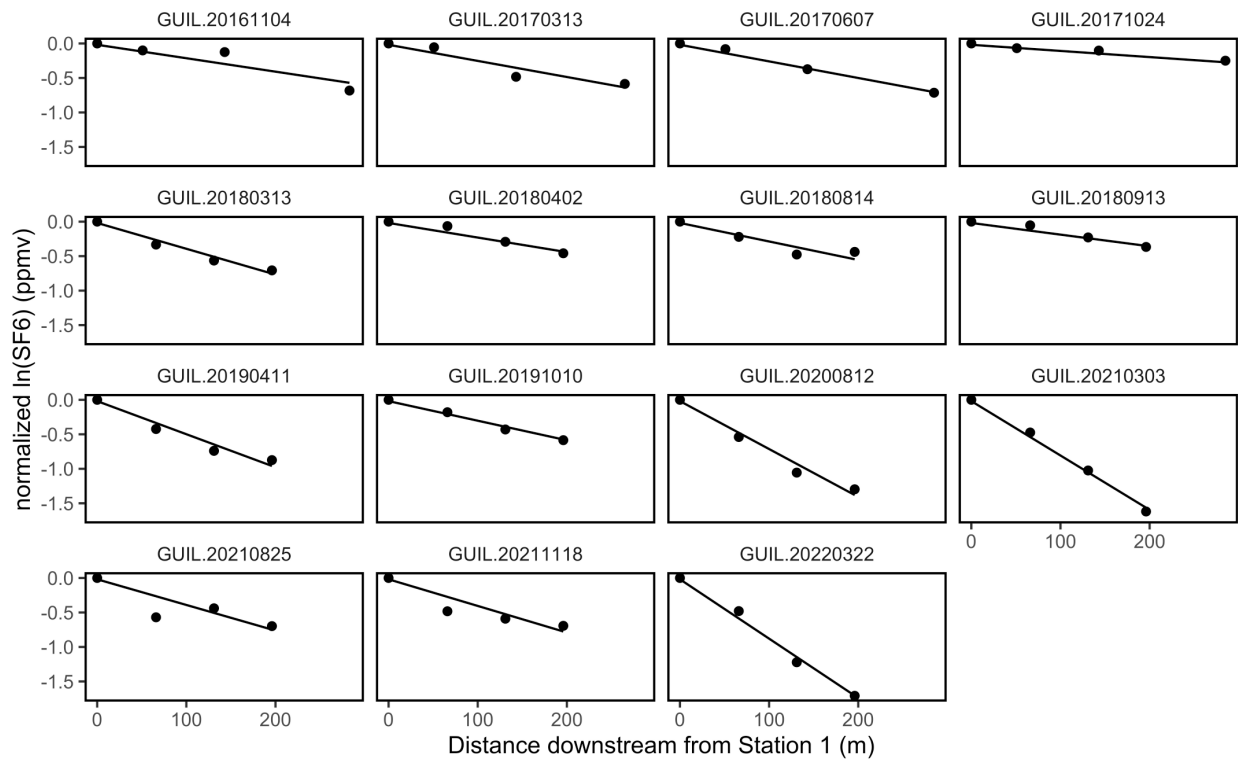

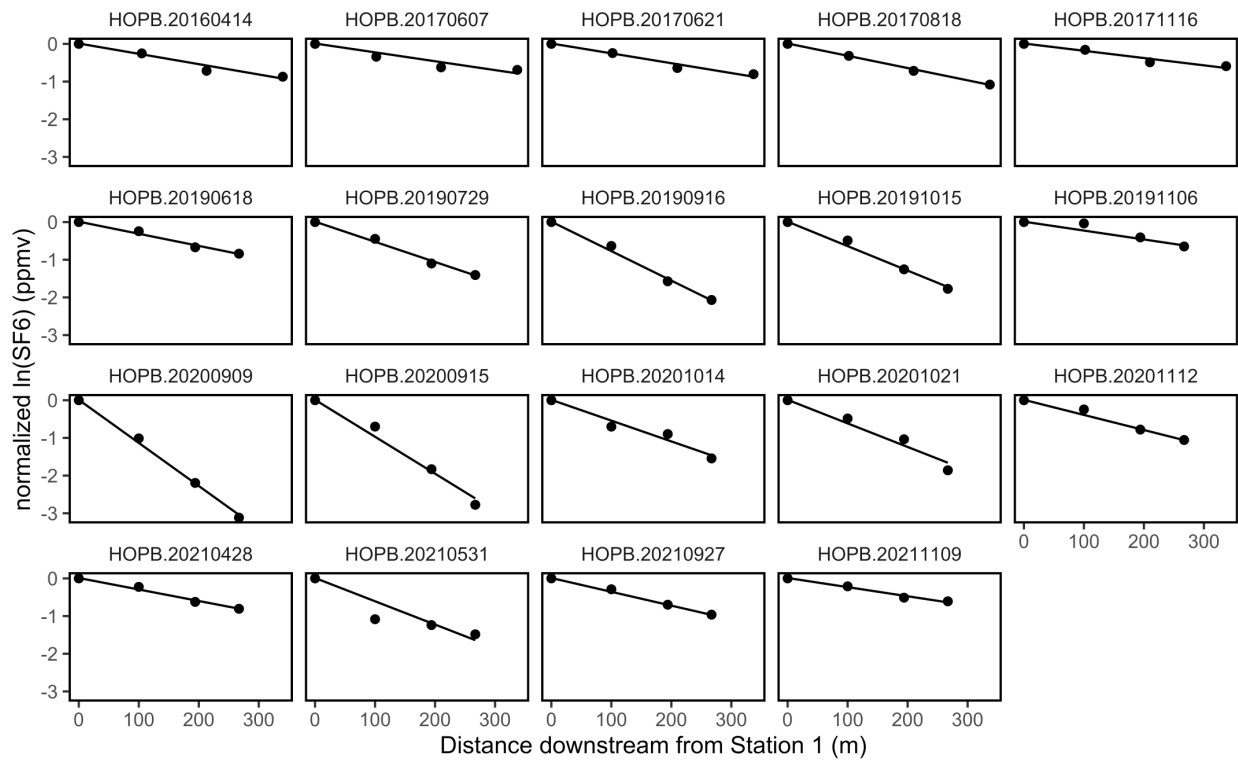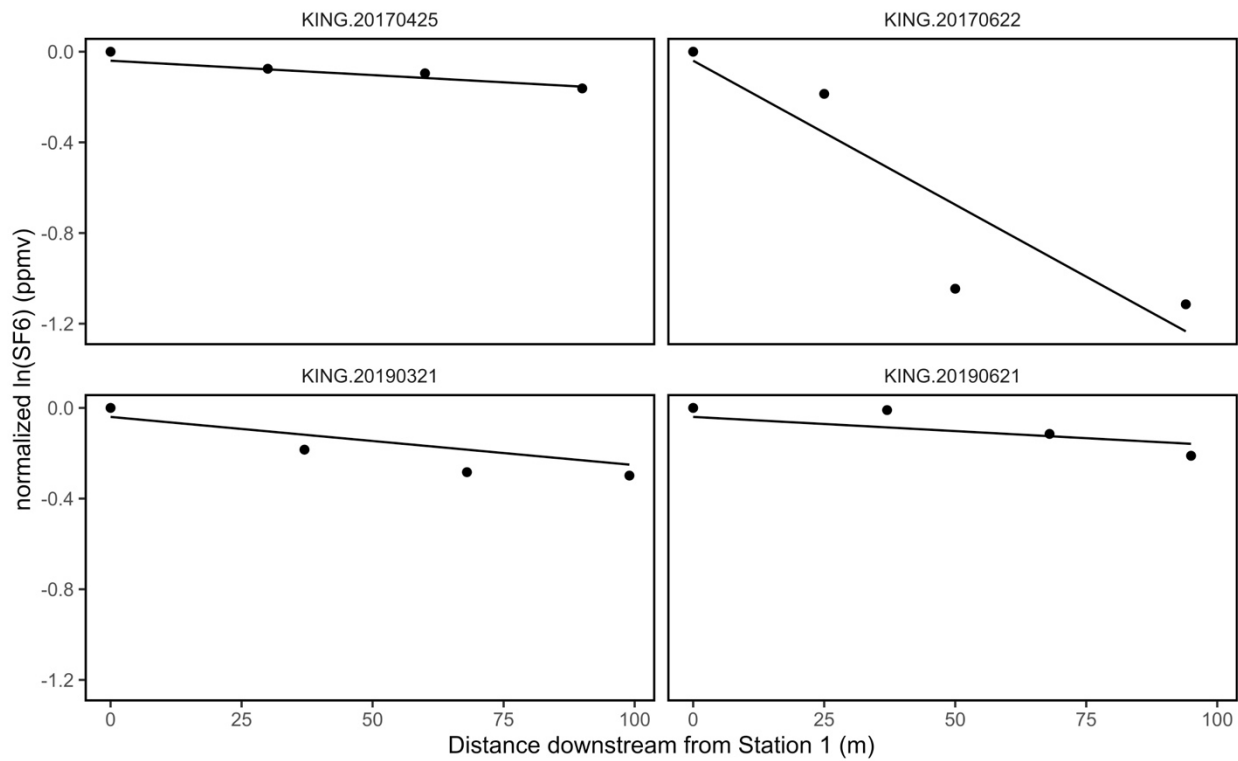

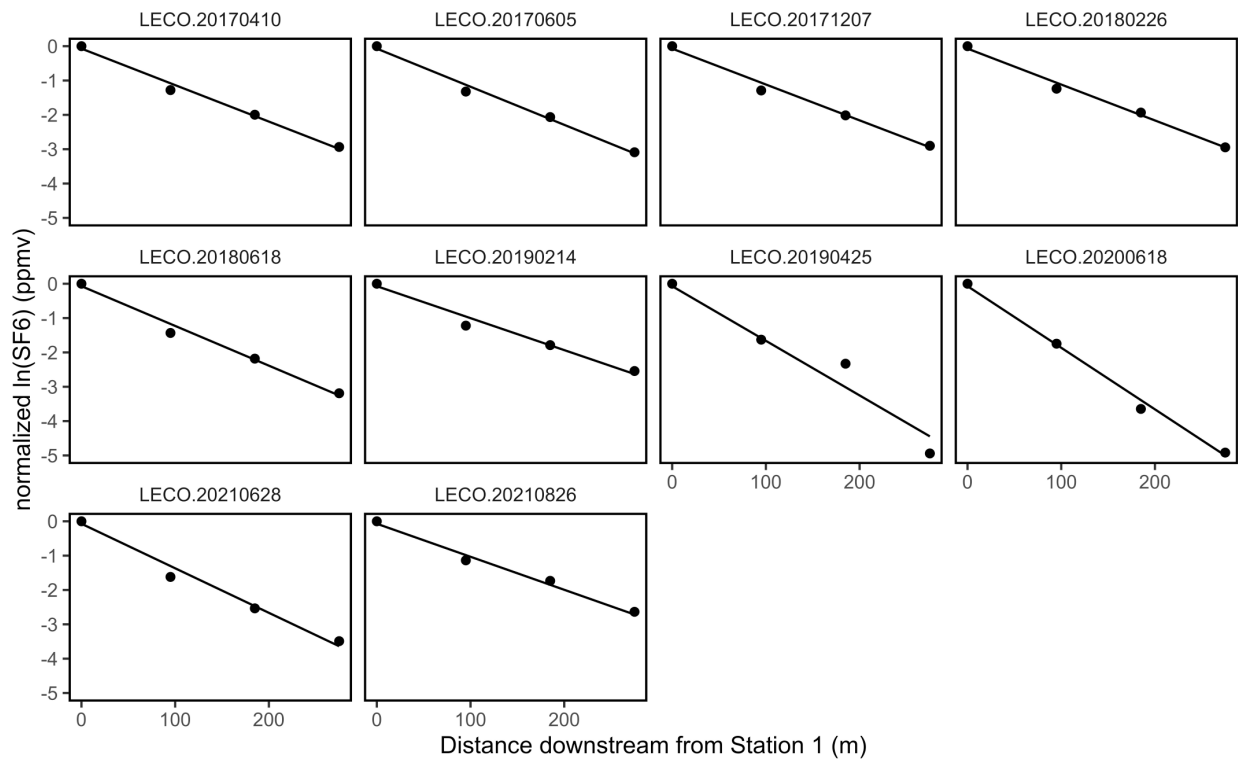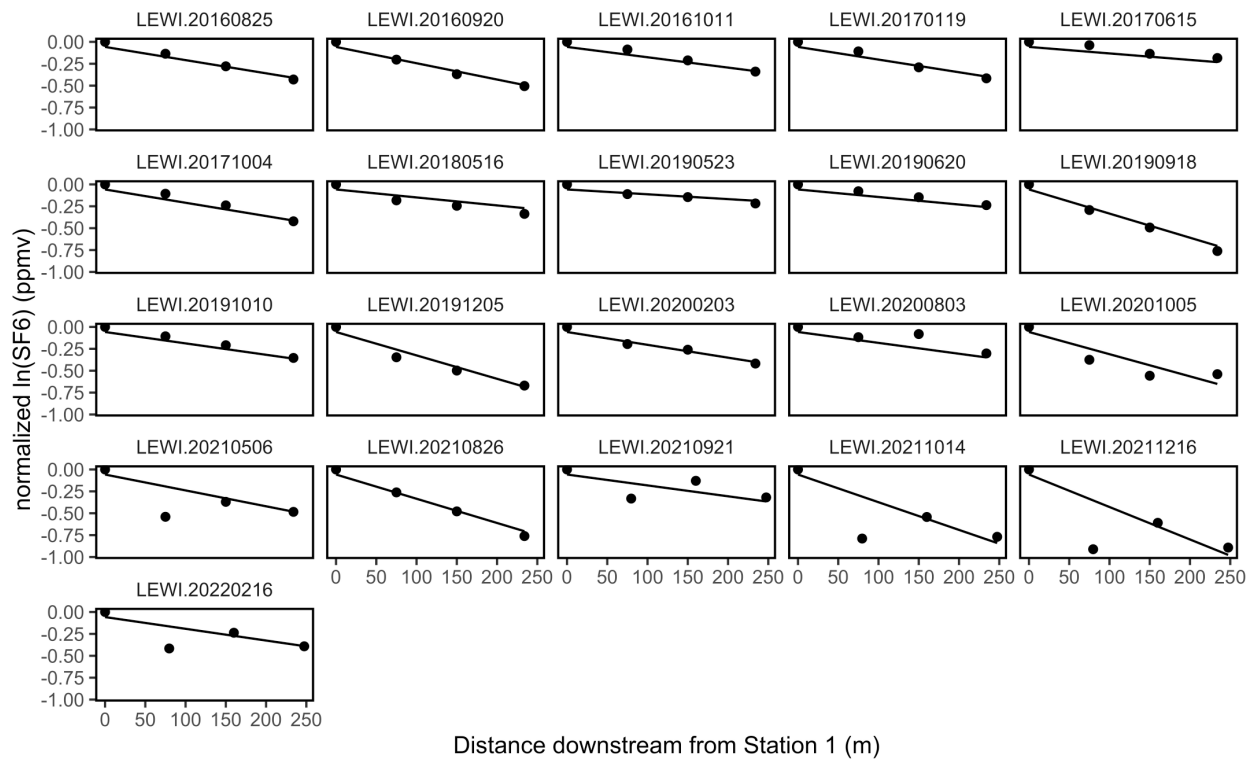

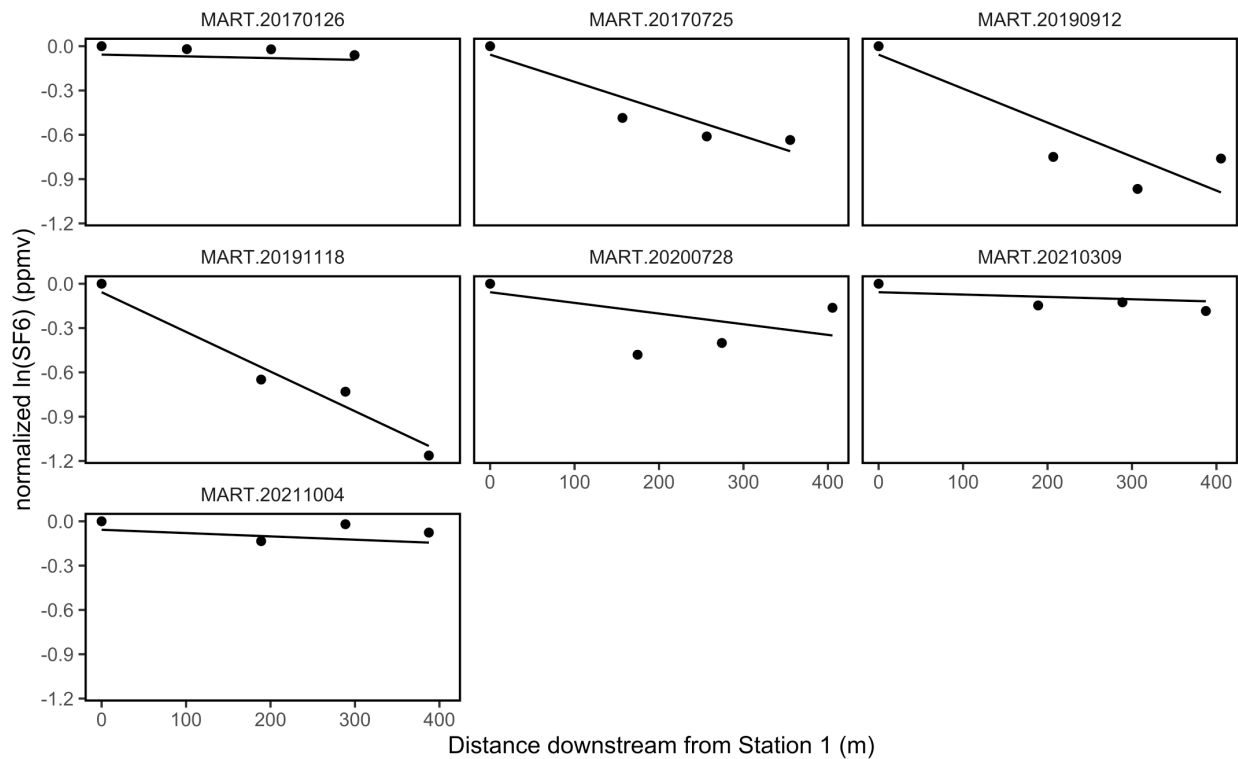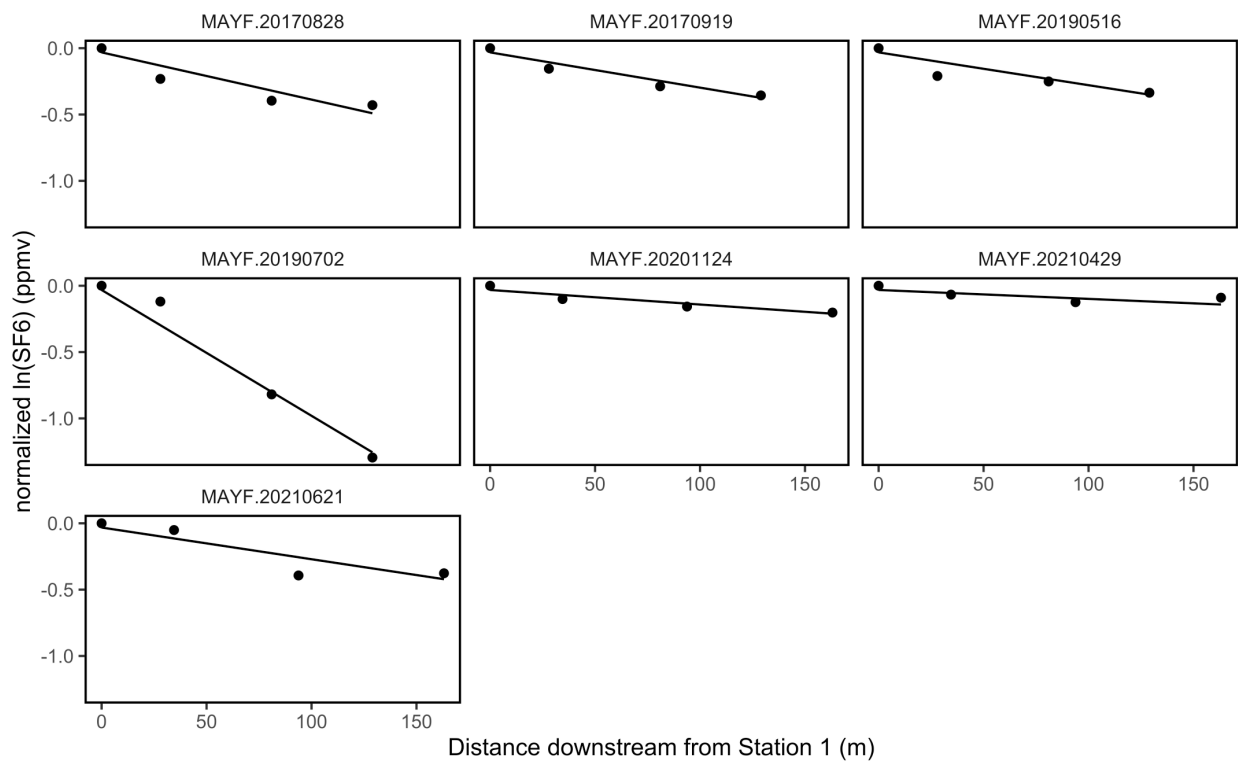

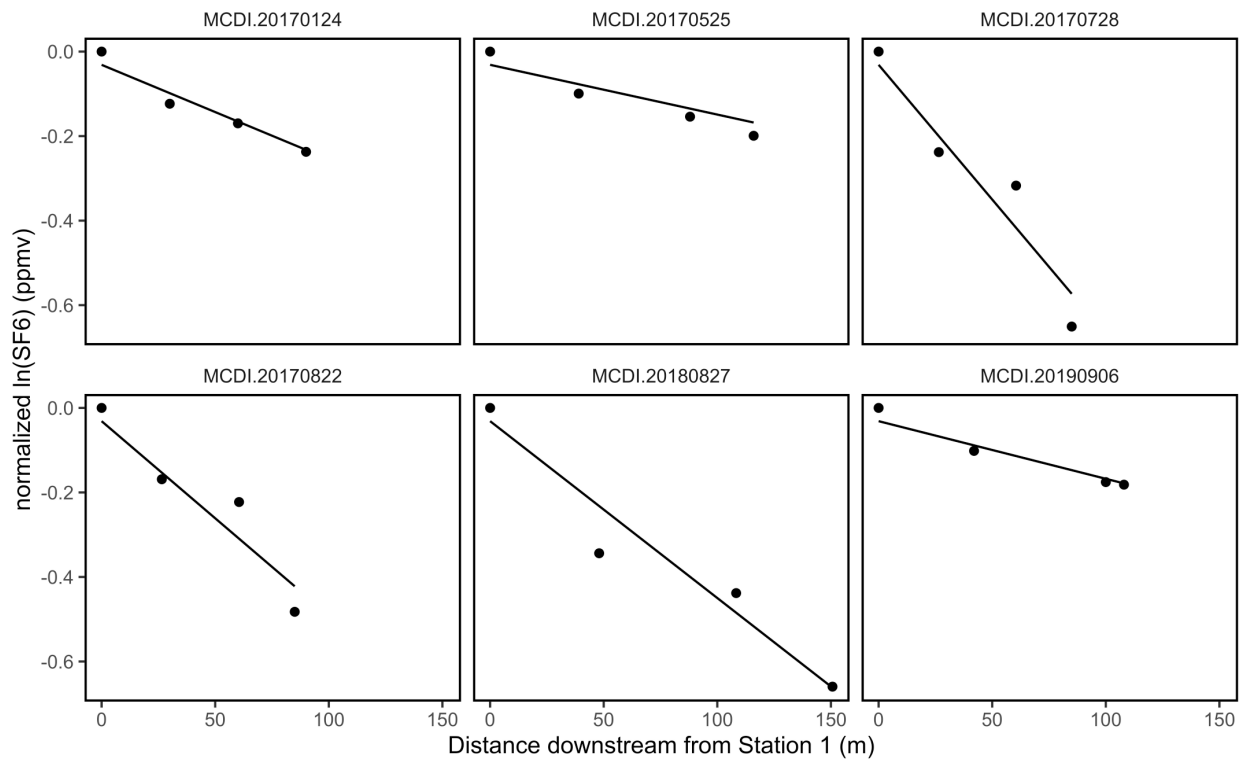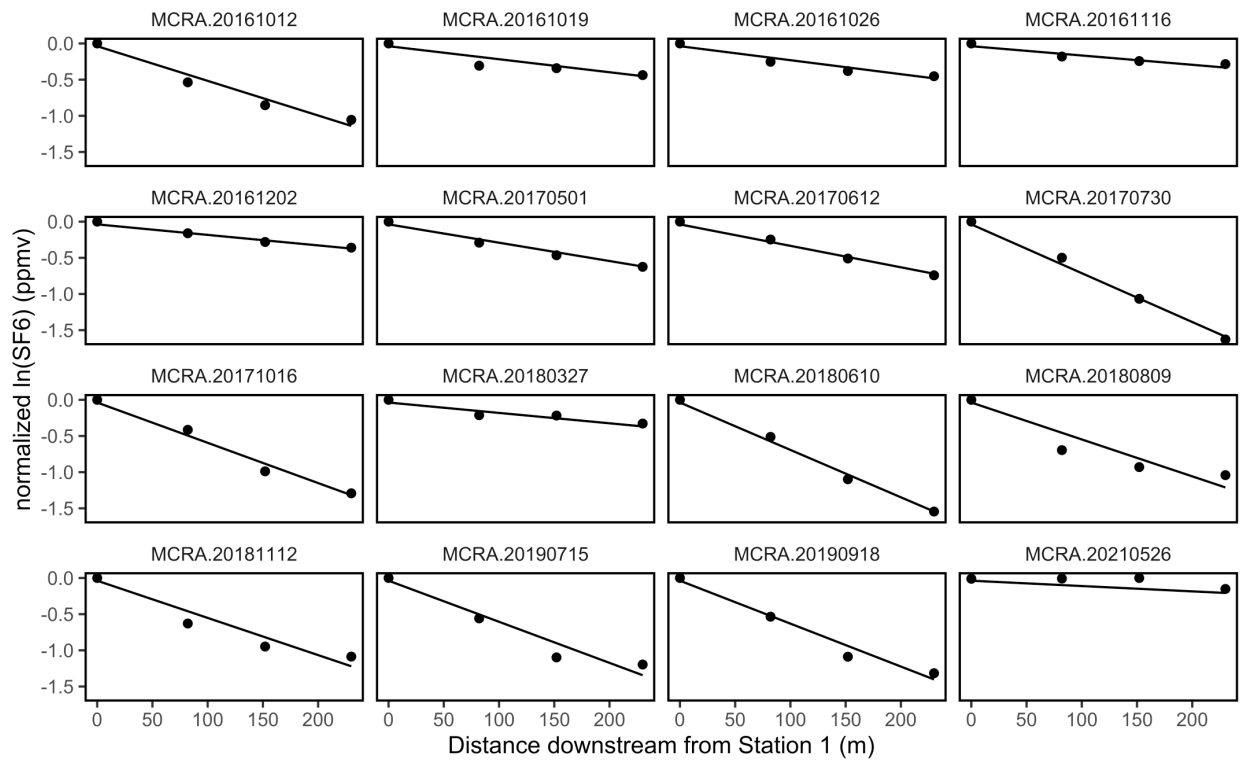

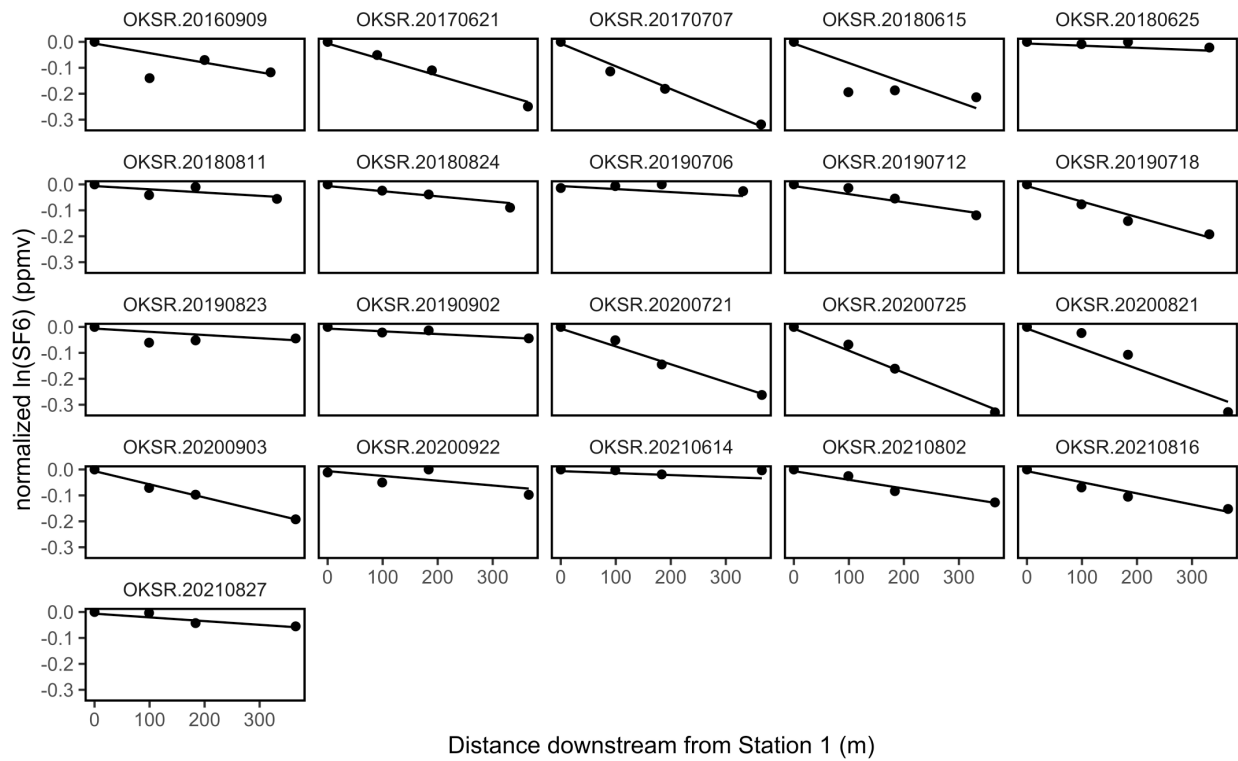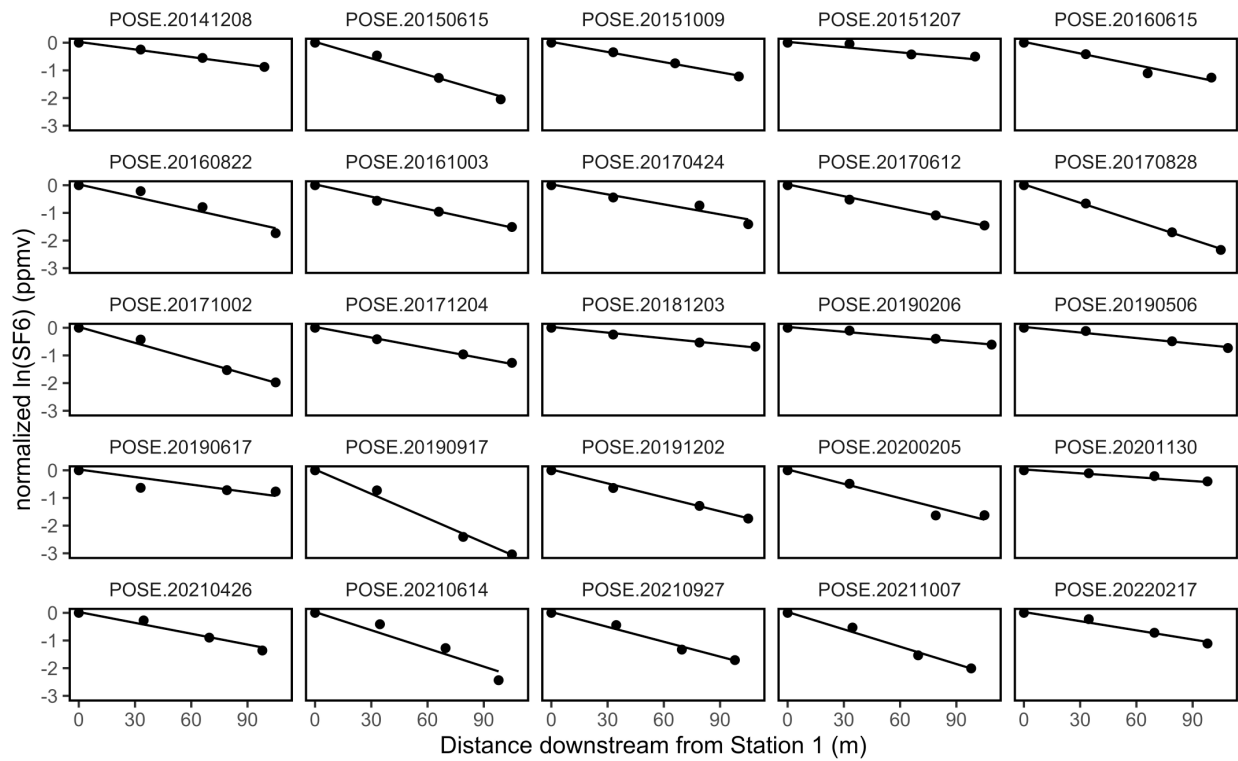

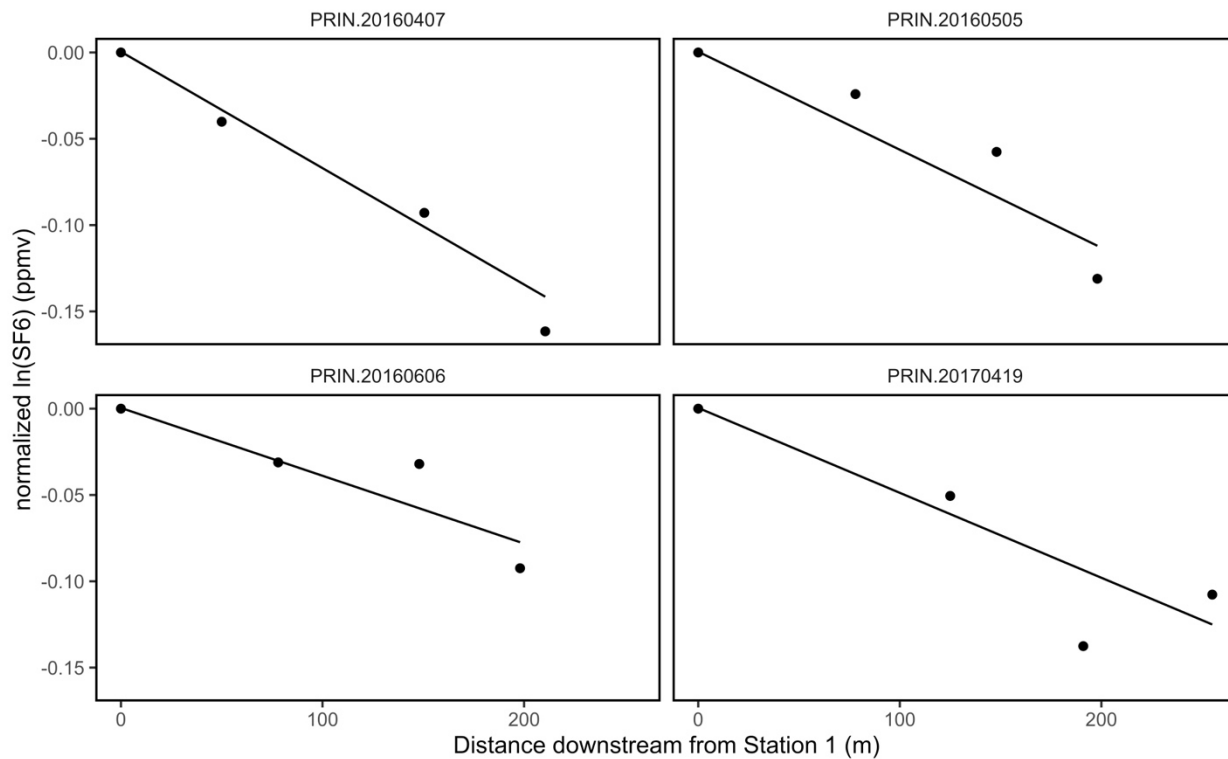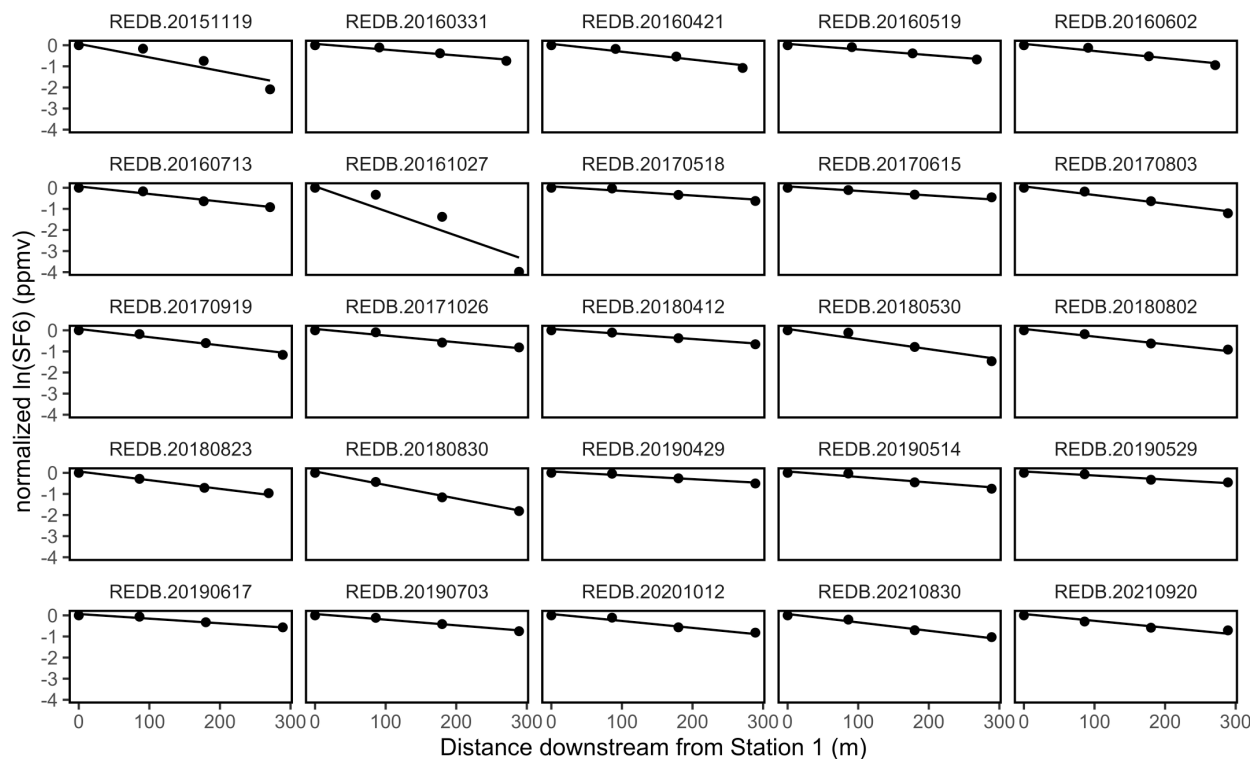

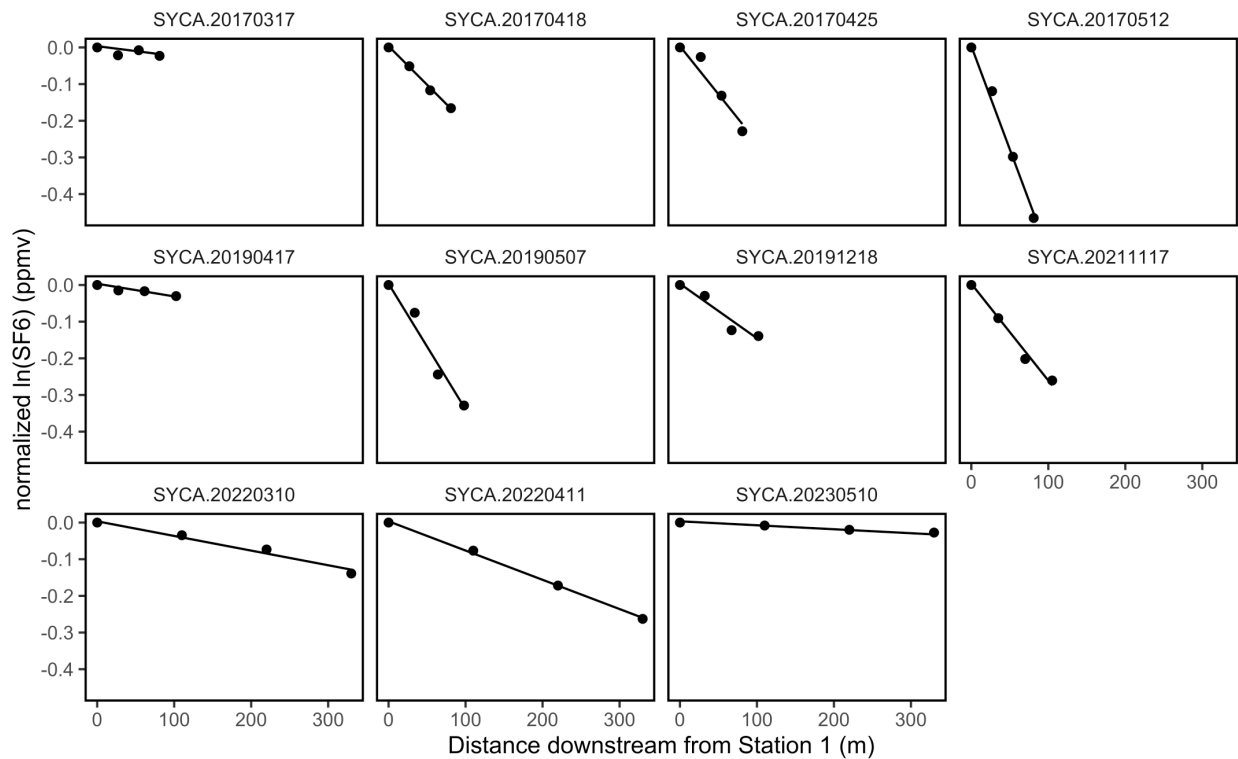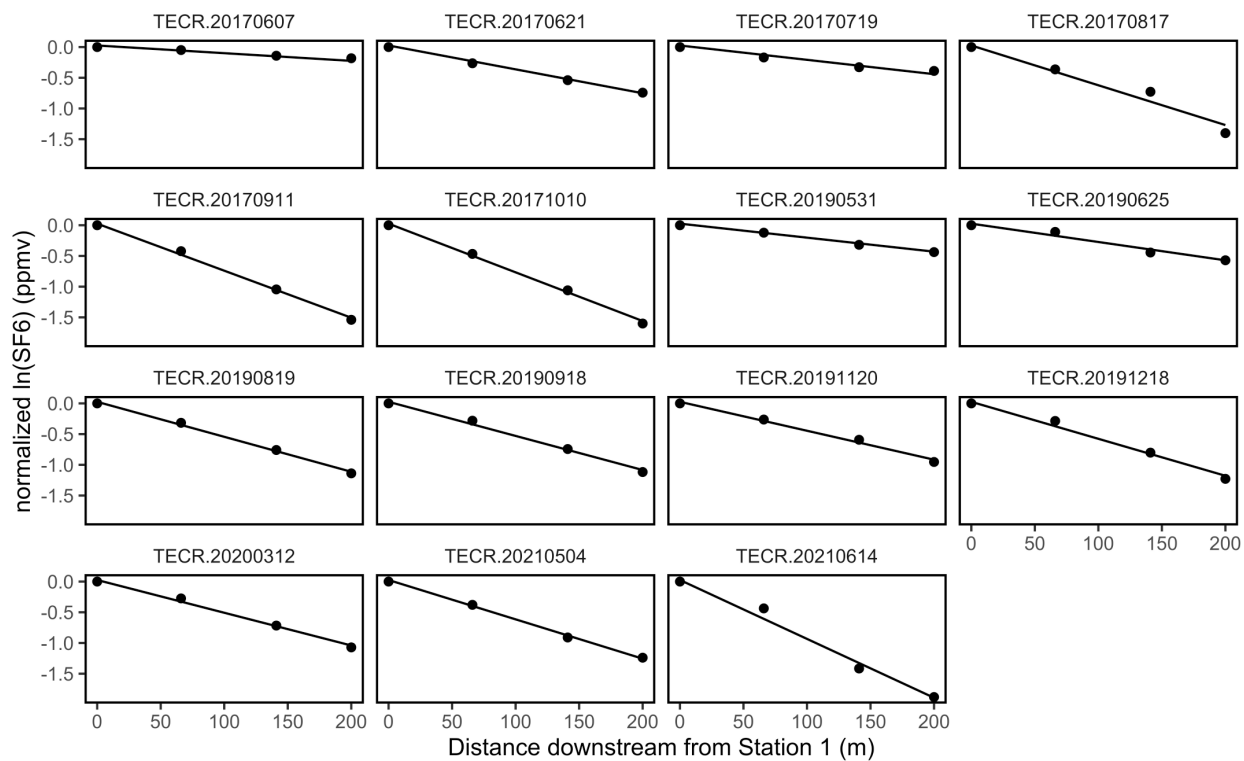



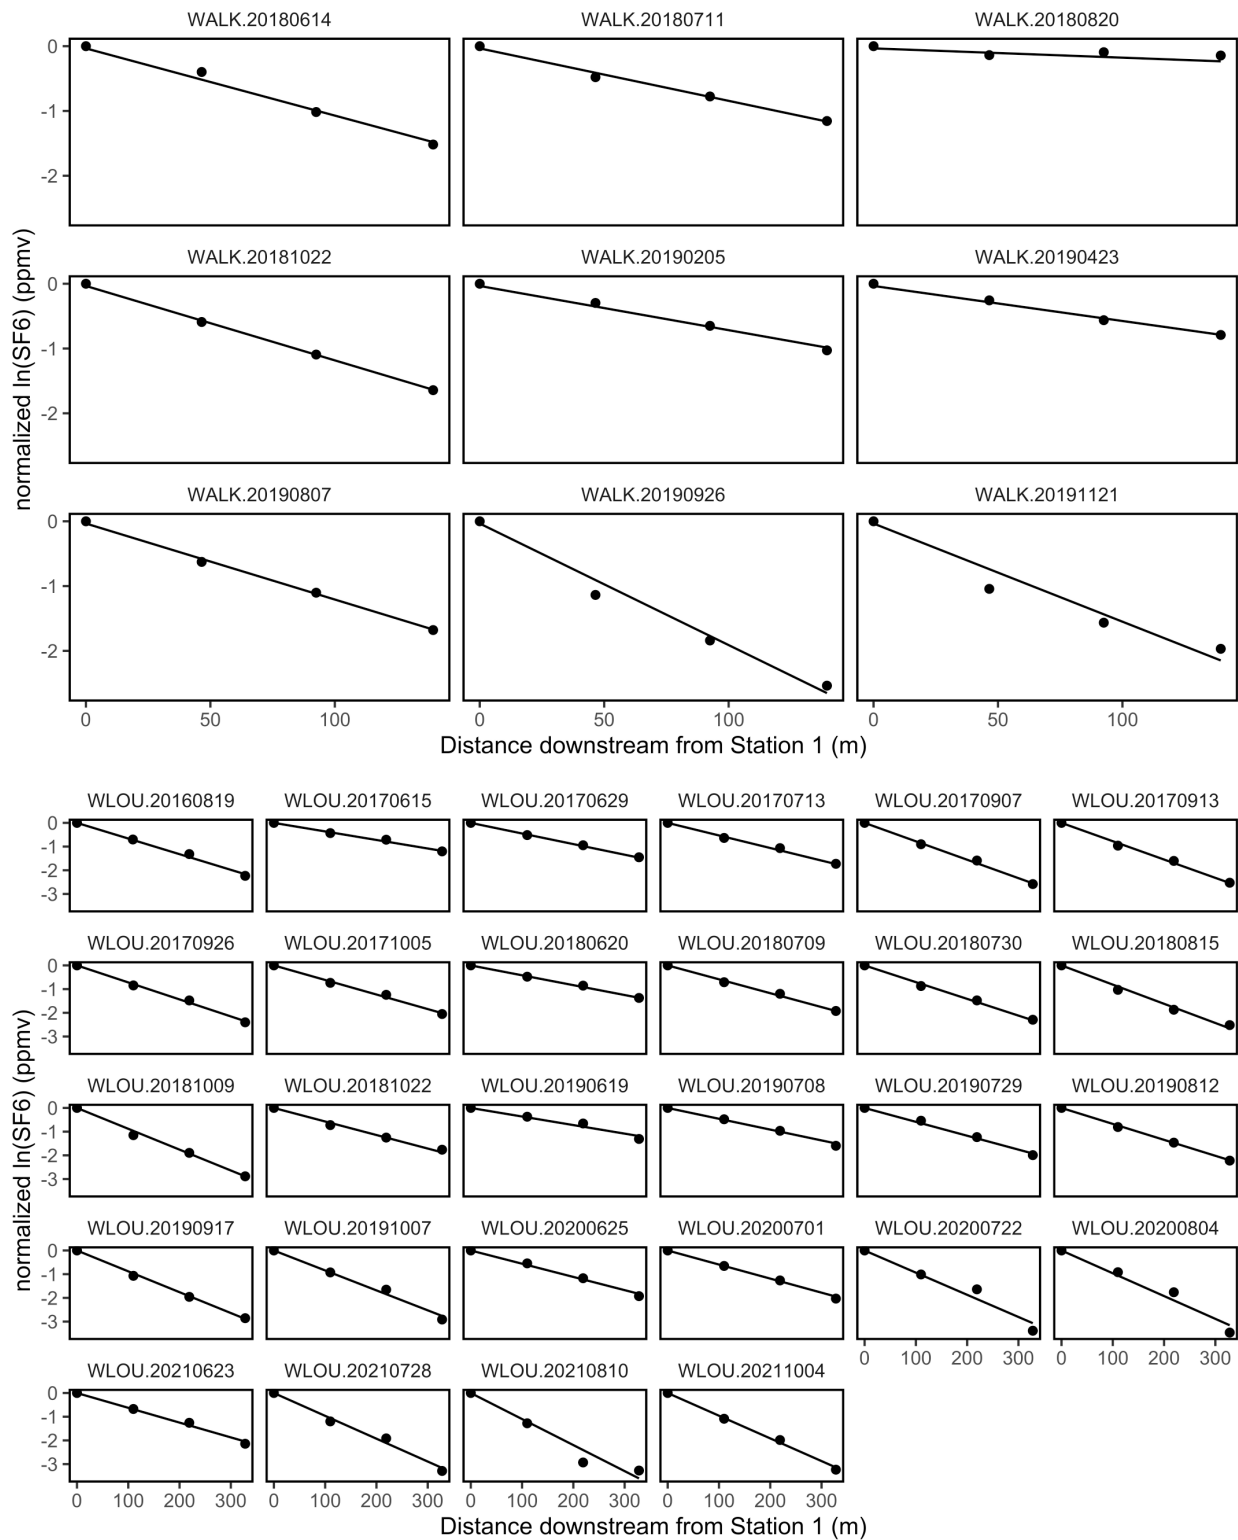

Figure S2. Model fits for Bayesian  $K_{600}$  models.

# COMO

stan k600 (no salt vs salt correction)

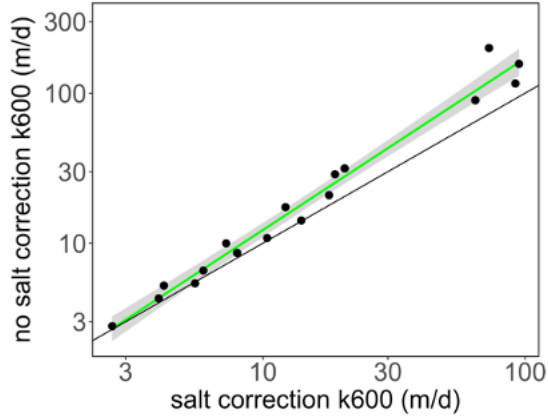

# CUPE

stan k600 (no salt vs salt correction)

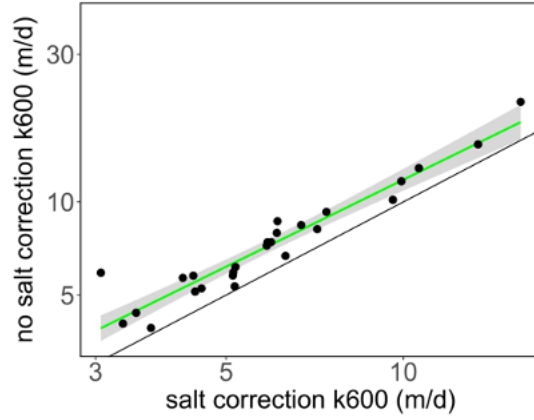

# GUIL

stan k600 (no salt vs salt correction)

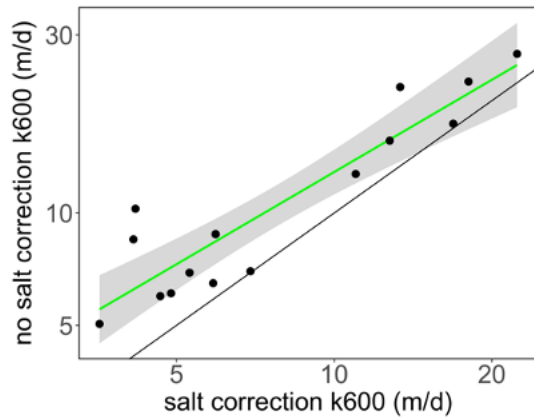

# MART

stan k600 (no salt vs salt correction)

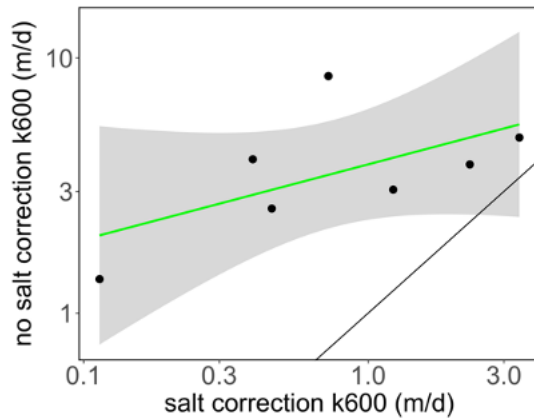

# POSE

stan k600 (no salt vs salt correction)

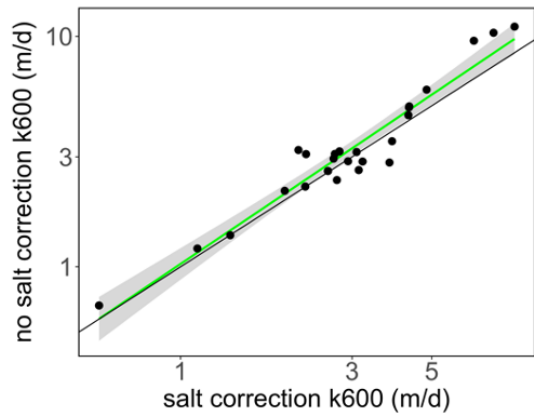

# TECR

stan k600 (no salt vs salt correction)

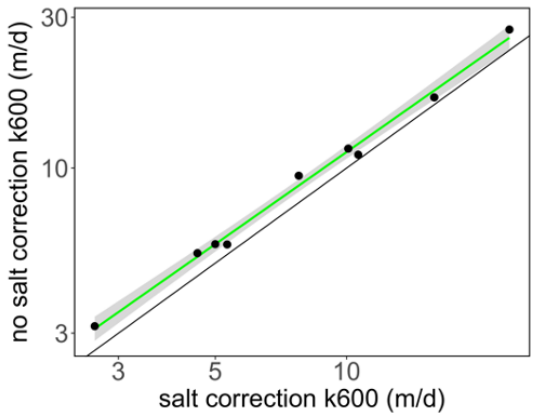

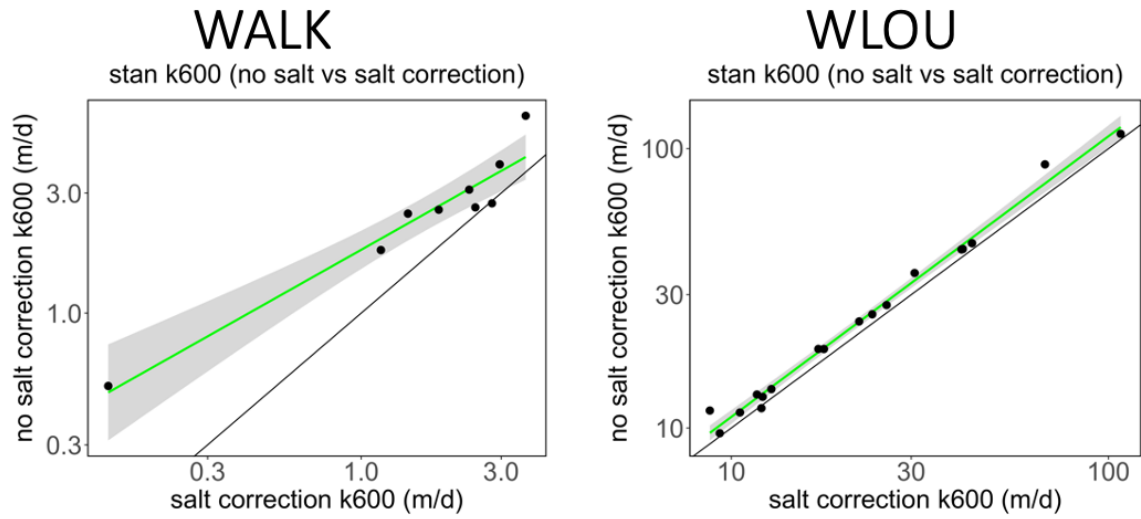

Figure S3. Comparison of salt-corrected  $k_{600}$  and uncorrected  $k_{600}$  for sites where a salt-correction was possible. A salt-correction is only recommended for COMO, CUPE, GUIL, MART, and WALK.
